# Supplementary material for: Guaianolide Sesquiterpene Lactones from Centaurothamnus maximus
Source: PubMed Central journal article supplement (PMC8038342; doi:10.3390/molecules26072055), 2021-04-03
Supplement: molecules-26-02055-s001.pdf [file molecules-26-02055-s001.pdf]

# Supplementary Materials

## Guaianolide Sesquiterpene Lactones from *Centaurothamnus maximus*

**Taha A. Hussien**<sup>1,†</sup>, **Tarik A. Mohamed**<sup>2,†</sup>, **Abdelsamed I. Elshamy**<sup>3</sup>, **Mahmoud F. Moustafa**<sup>4,5</sup>, **Hesham R. El-Seedi**<sup>6,7,\*</sup>, **Paul W. Pare**<sup>8</sup> and **Mohamed-Elamir F. Hegazy**<sup>2,\*</sup>

<sup>1</sup> Pharmacognosy Department, Faculty of Pharmacy, Sphinx University, New Assiut City, Assiut 10, Egypt; thussien71@yahoo.com

<sup>2</sup> Chemistry of Medicinal Plants Department, National Research Centre, 33 El-Bohouth St., Dokki, Giza 12622, Egypt; ta.mourad@nrc.sci.eg

<sup>3</sup> Department of Natural Compounds Chemistry, National Research Centre, 33 El-Bohouth St., Dokki, Giza 12622, Egypt; ai.el-shamy@nrc.sci.eg

<sup>4</sup> Department of Biology, College of Science, King Khalid University, Abha 61421, Saudi Arabia; mfmostfa@kku.edu.sa

<sup>5</sup> Department of Botany & Microbiology, Faculty of Science, South Valley University, Qena 83523, Egypt

<sup>6</sup> Department of Molecular Biosciences, The Wenner-Gren Institute, Stockholm University, S-106 91 Stockholm, Sweden

<sup>7</sup> International Research Center for Food Nutrition and Safety, Jiangsu University, Zhenjiang 212013, China

<sup>8</sup> Department of Chemistry, Faculty of Science, Menoufia University, 32512 Shebin El-Kom, Egypt

<sup>9</sup> Department of Chemistry & Biochemistry, Texas Tech University, Lubbock, TX 79409, USA; paul.pare@ttu.edu

<sup>10</sup> Department of Pharmaceutical Biology, Institute of Pharmaceutical and Biomedical Sciences, Johannes Gutenberg University, Staudinger Weg 5, 55128 Mainz

\* Correspondence: hesham.elseedi@su.se (H.R.E.-S.); me.fathy@nrc.sci.eg (M.-E.F.H.); Tel.: +46-73-566-8234 (H.R.E.-S.); Tel.: +2-033-371-635 (M.-E.F.H.)

† These authors contributed equally to this work.

| <b>Supporting data</b>                                                   | <b>Page</b> |
|--------------------------------------------------------------------------|-------------|
| S1: <sup>1</sup> H NMR (CDCl <sub>3</sub> , 500 MHz) of <b>1</b> .....   | 3           |
| S2: <sup>13</sup> C NMR (CDCl <sub>3</sub> , 125 MHz) of <b>1</b> .....  | 4           |
| S3:DEPT of <b>1</b> .....                                                | 5           |
| S4:HSQC of <b>1</b> .....                                                | 6           |
| S5:HMBC of <b>1</b> .....                                                | 7           |
| S6: <sup>1</sup> H <sup>1</sup> H COSY of <b>1</b> .....                 | 8           |
| S7:NOESY <b>1</b> .....                                                  | 9           |
| S8: HRCIMS <b>1</b> .....                                                | 10          |
| S9: <sup>1</sup> H NMR (CDCl <sub>3</sub> , 500 MHz) of <b>2</b> .....   | 11          |
| S10: <sup>13</sup> C NMR (CDCl <sub>3</sub> , 125 MHz) of <b>2</b> ..... | 12          |
| S11:DEPT of <b>2</b> .....                                               | 13          |
| S12:HSQC of <b>2</b> .....                                               | 14          |
| S13:HMBC of <b>2</b> .....                                               | 15          |
| S14: <sup>1</sup> H <sup>1</sup> H COSY of <b>2</b> .....                | 16          |
| S15:NOESY <b>2</b> .....                                                 | 17          |
| S16: HRCIMS <b>2</b> .....                                               | 18          |
| S17: <sup>1</sup> H NMR (CDCl <sub>3</sub> , 500 MHz) of <b>3</b> .....  | 19          |
| S18: <sup>13</sup> C NMR (CDCl <sub>3</sub> , 125 MHz) of <b>3</b> ..... | 20          |
| S19: <sup>1</sup> H NMR (CDCl <sub>3</sub> , 500 MHz) of <b>4</b> .....  | 21          |
| S20: <sup>13</sup> C NMR (CDCl <sub>3</sub> , 125 MHz) of <b>4</b> ..... | 22          |
| S21: <sup>1</sup> H NMR (CDCl <sub>3</sub> , 500 MHz) of <b>5</b> .....  | 23          |
| S22: <sup>13</sup> C NMR (CDCl <sub>3</sub> , 125 MHz) of <b>5</b> ..... | 24          |
| S23: <sup>1</sup> H NMR (CDCl <sub>3</sub> , 500 MHz) of <b>6</b> .....  | 25          |
| S24: <sup>13</sup> C NMR (CDCl <sub>3</sub> , 125 MHz) of <b>6</b> ..... | 26          |
| S25: <sup>1</sup> H NMR (CDCl <sub>3</sub> , 500 MHz) of <b>7</b> .....  | 27          |
| S26: <sup>13</sup> C NMR (CDCl <sub>3</sub> , 125 MHz) of <b>7</b> ..... | 28          |
| S27: <sup>1</sup> H NMR (CDCl <sub>3</sub> , 500 MHz) of <b>8</b> .....  | 29          |
| S28: <sup>1</sup> H NMR (CDCl <sub>3</sub> , 500 MHz) of <b>9</b> .....  | 31          |

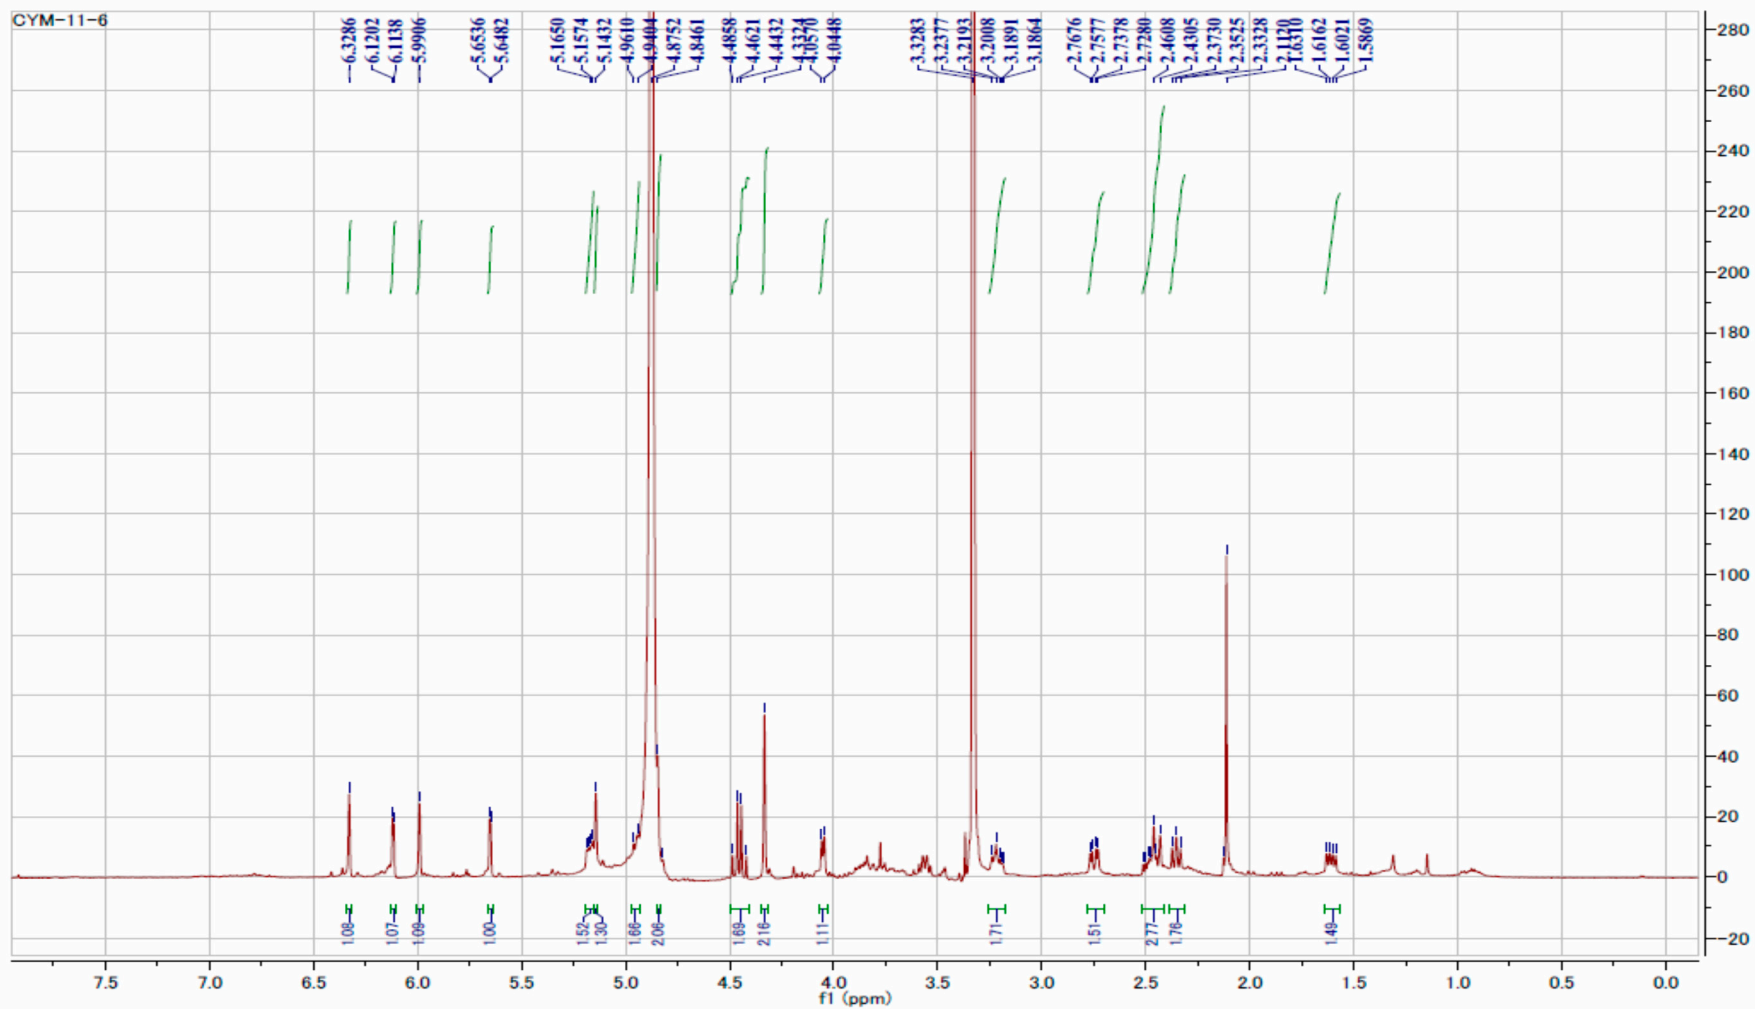

S1:  $^1\text{H}$  NMR ( $\text{CDCl}_3$ , 500 MHz) of **1**

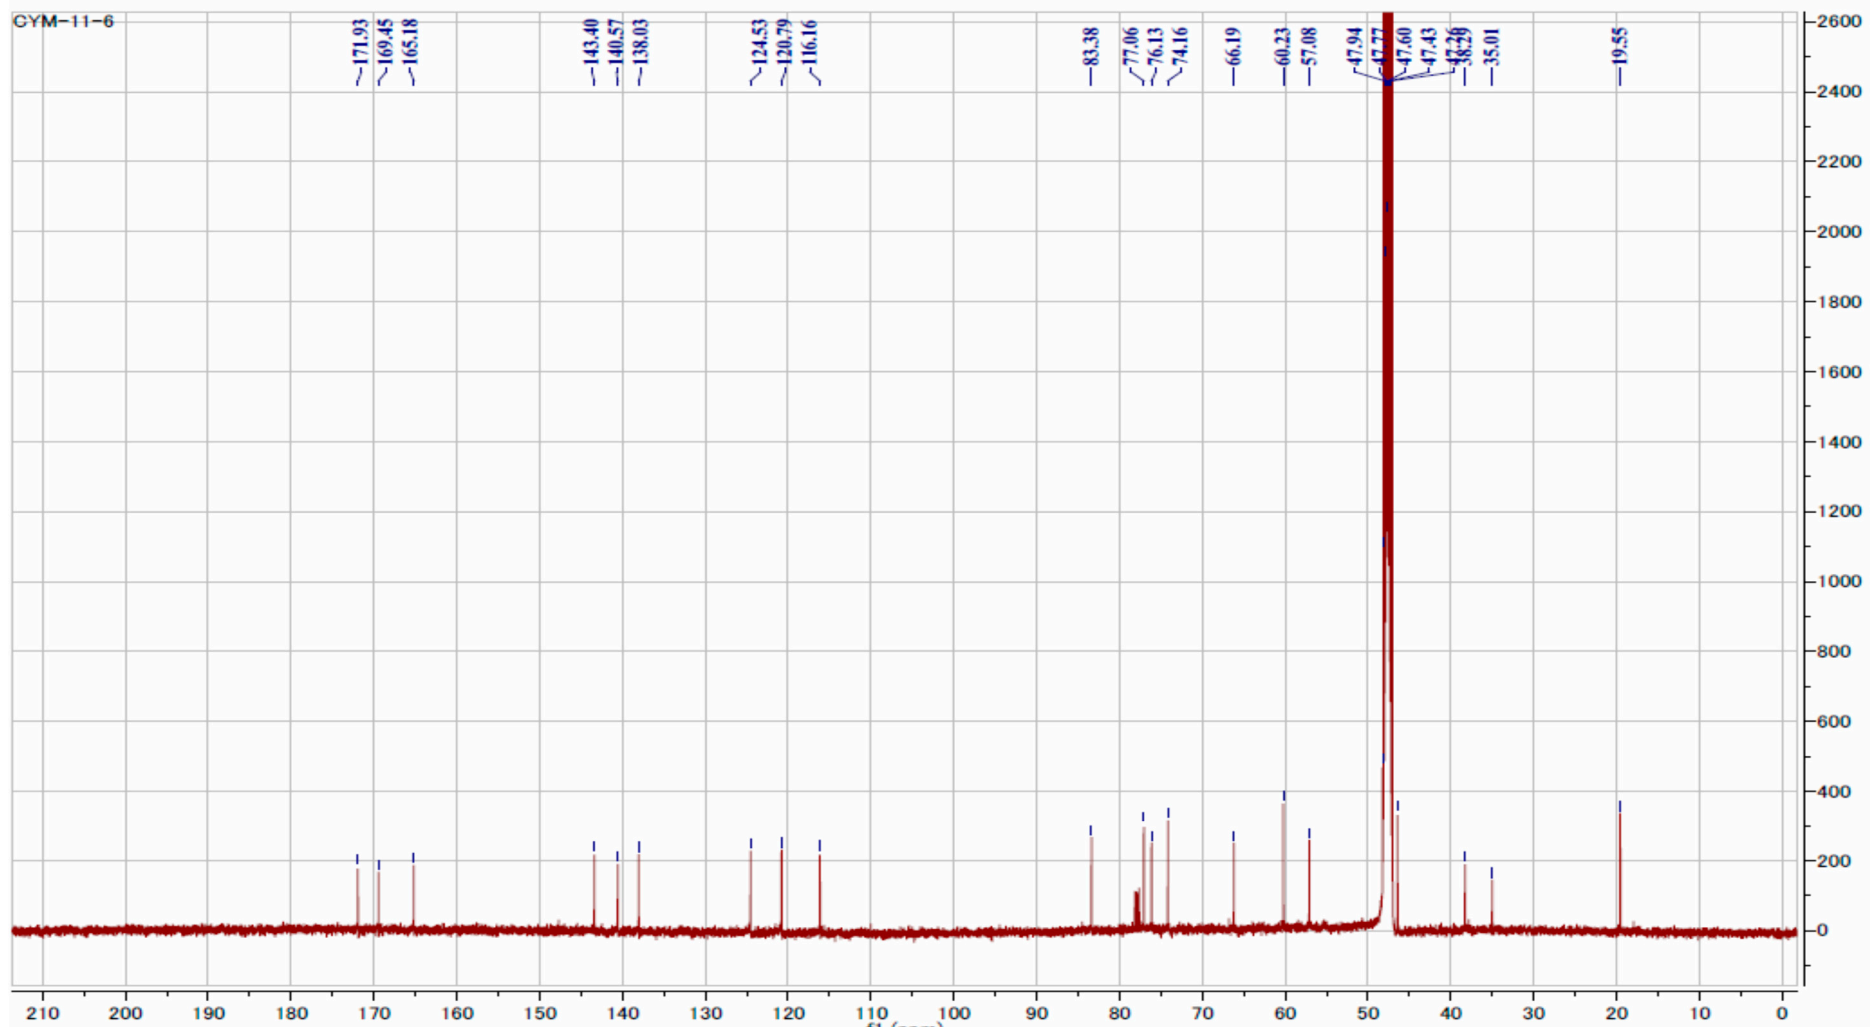

S2:  $^{13}\text{C}$  NMR ( $\text{CDCl}_3$ , 125 MHz) of **1**

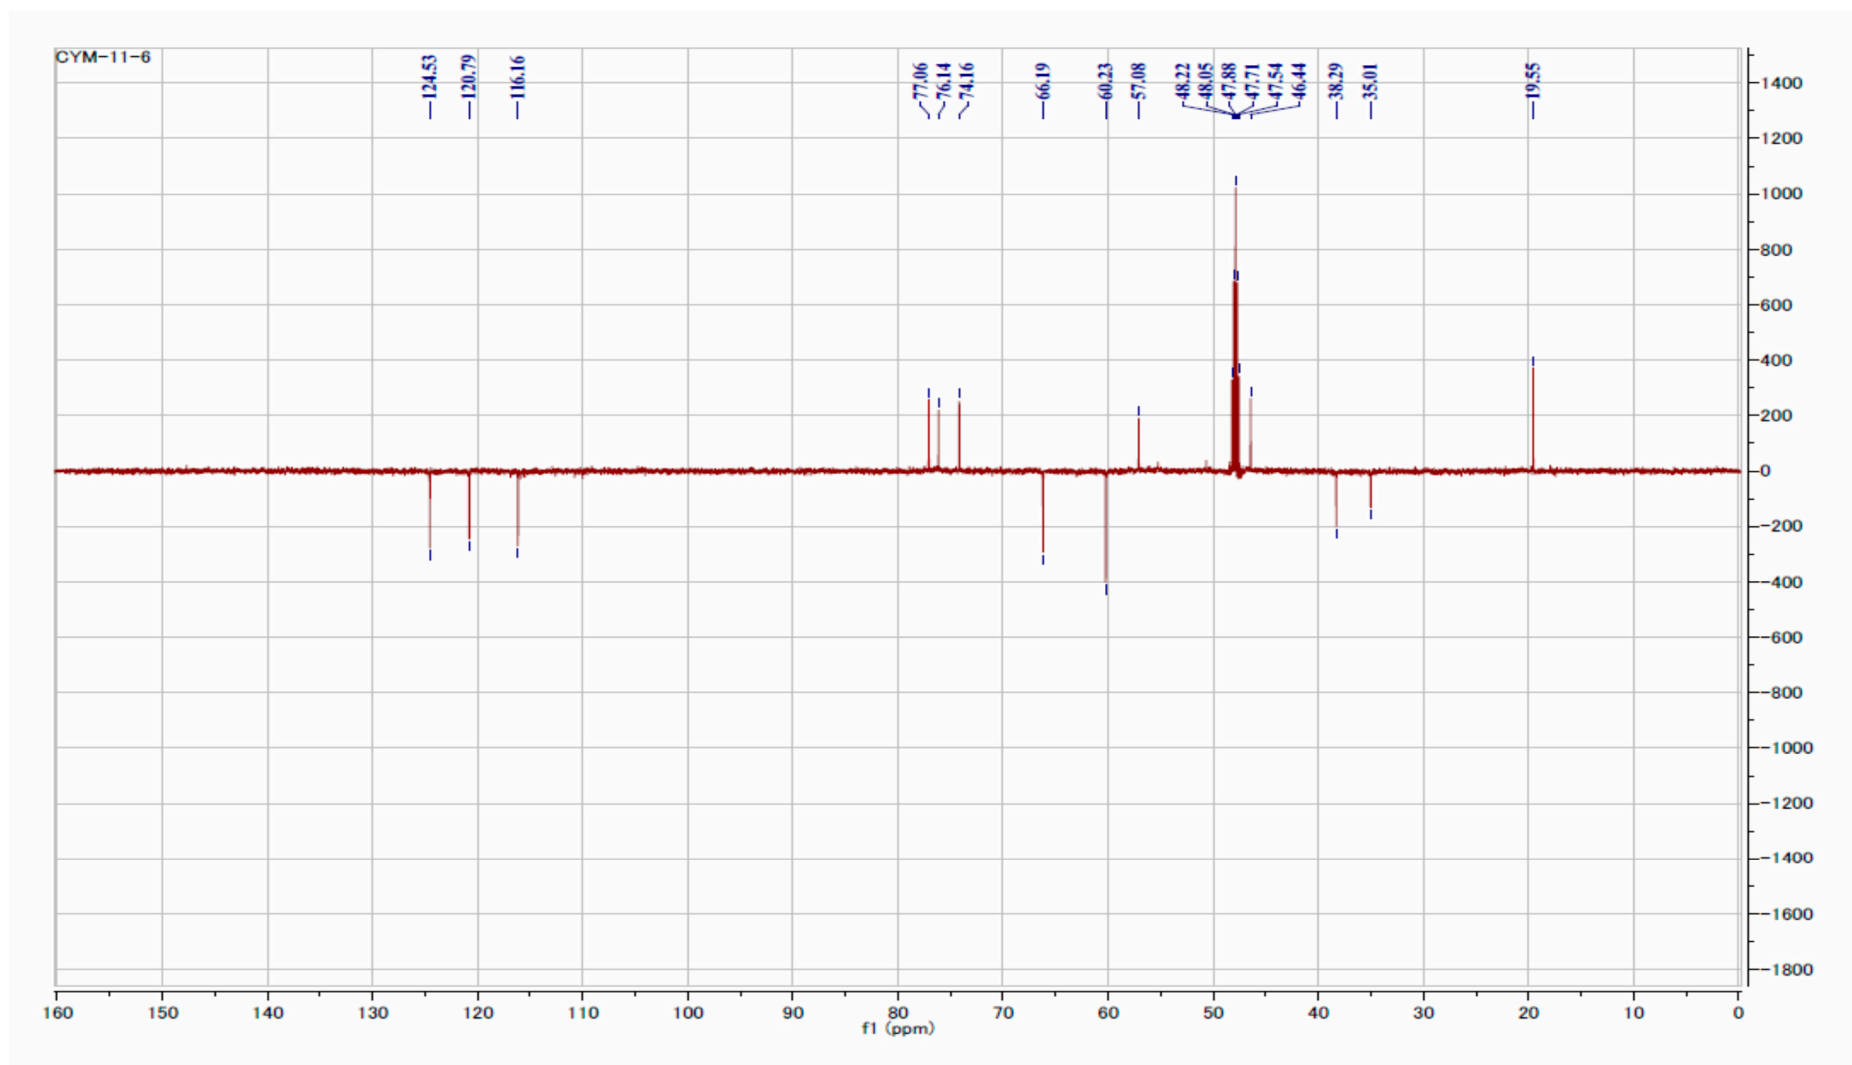

S3:DEPT of 1

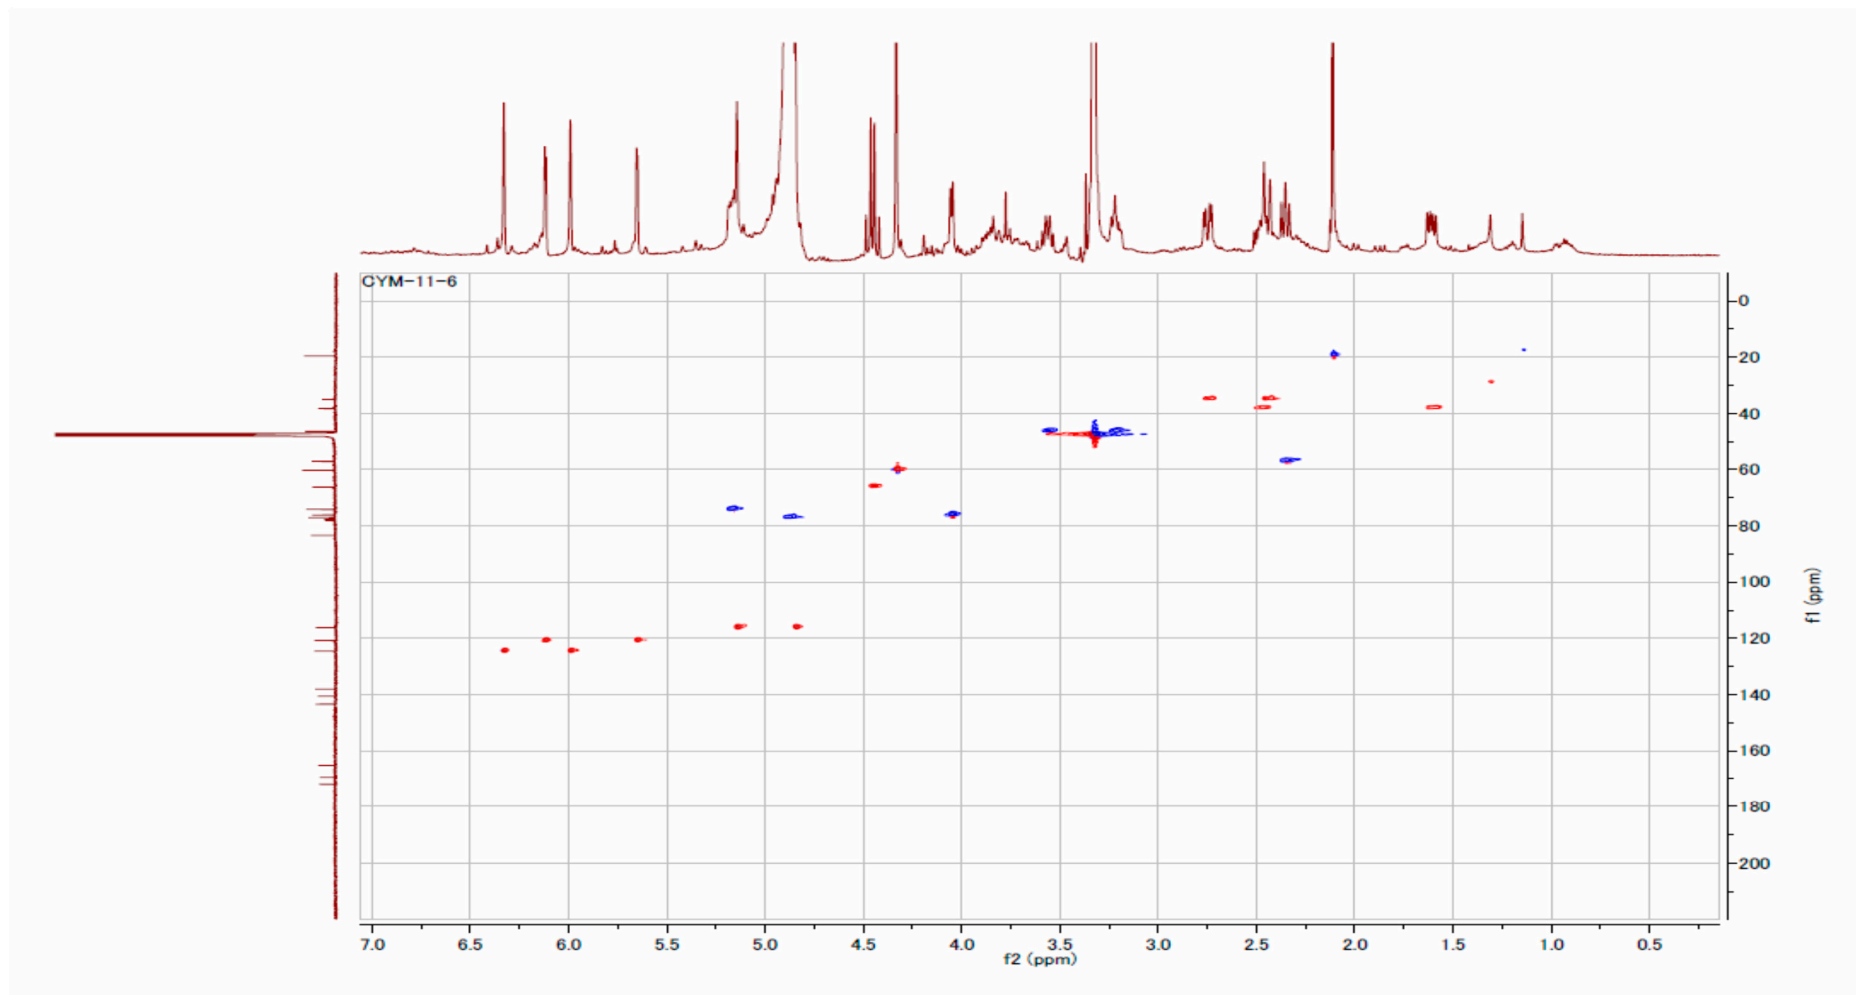

S4:HSQC of 1

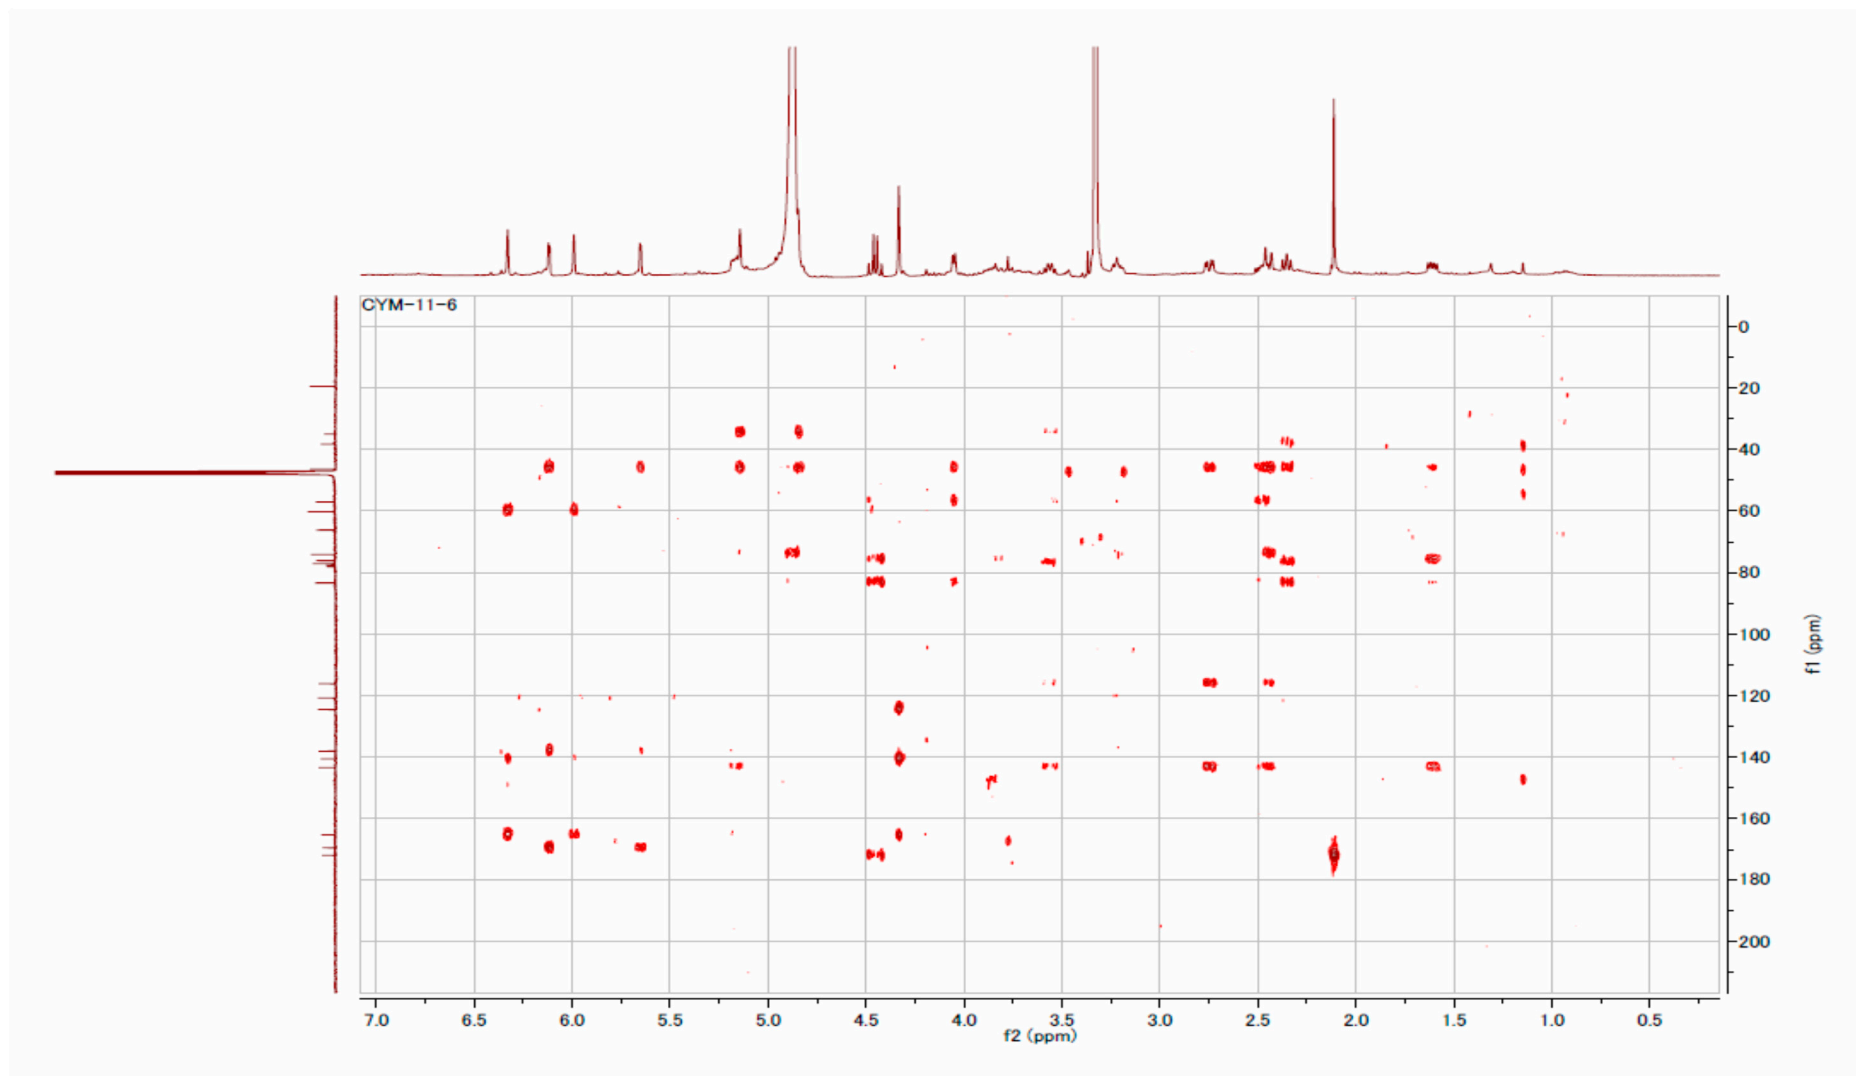

S5:HMBC of 1

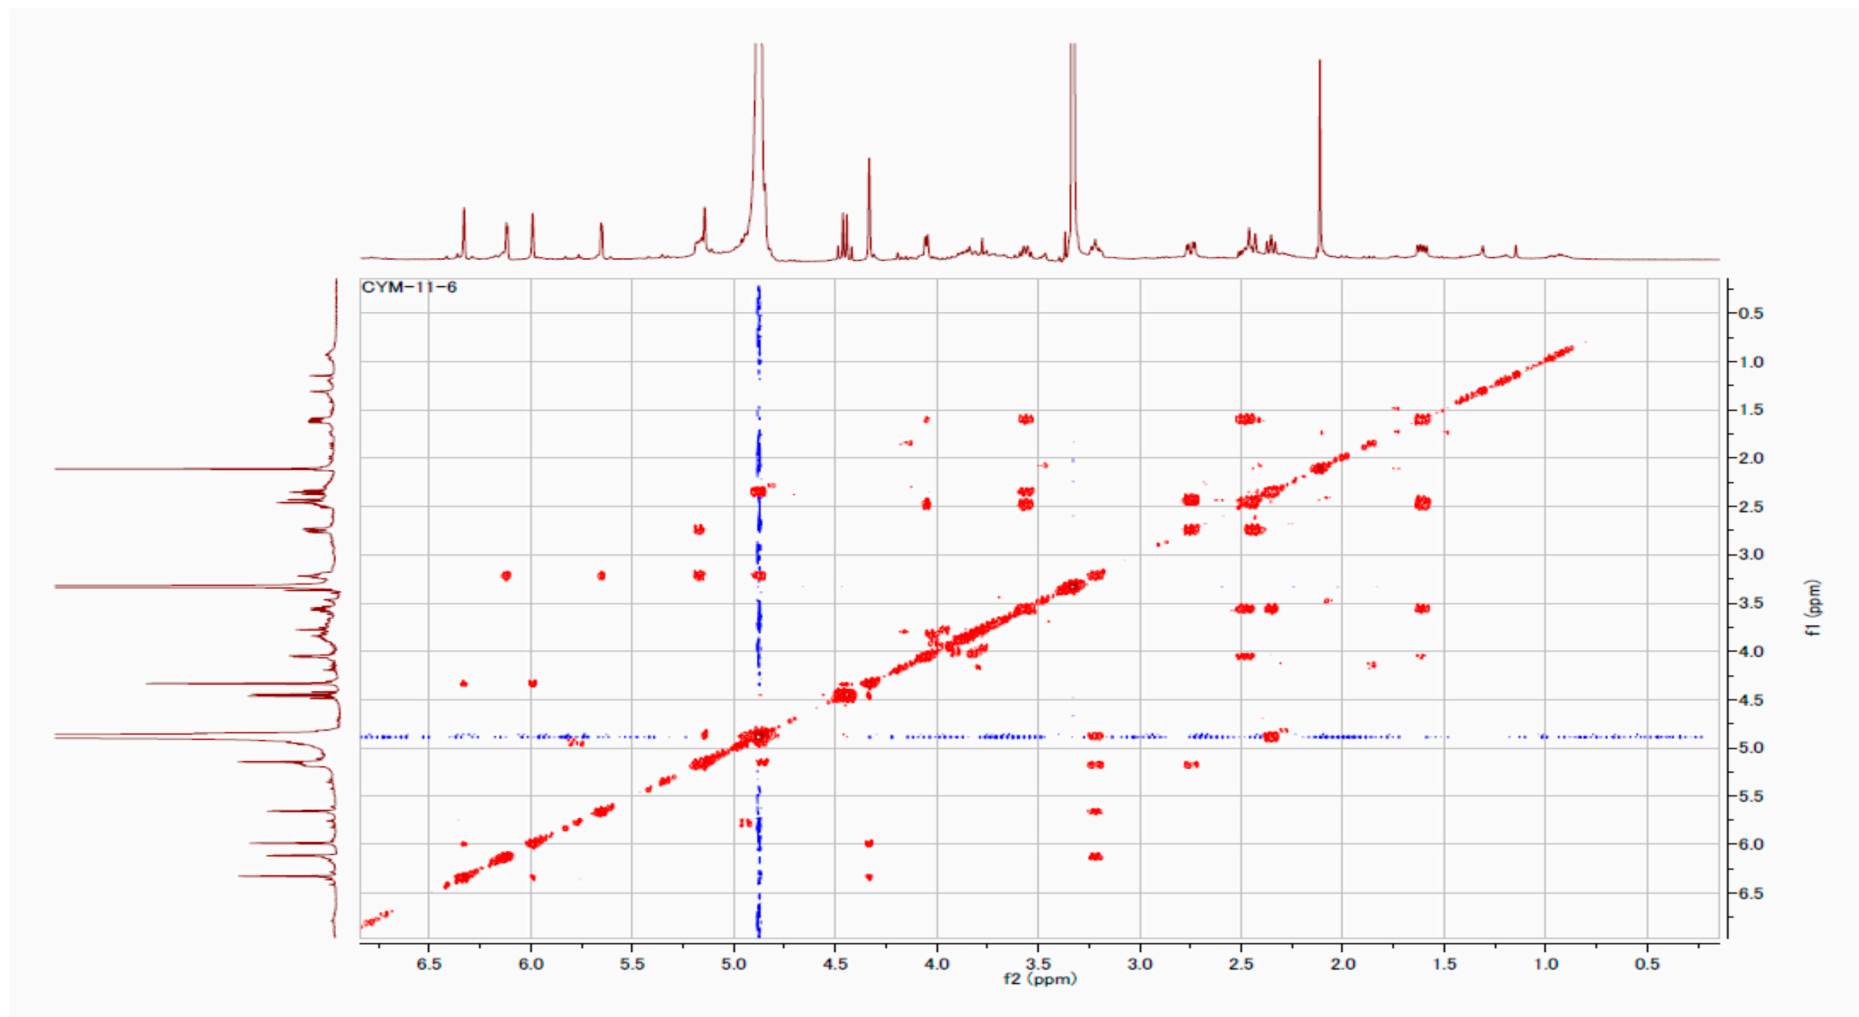

S6:  $^1\text{H}$   $^1\text{H}$  COSY of 1



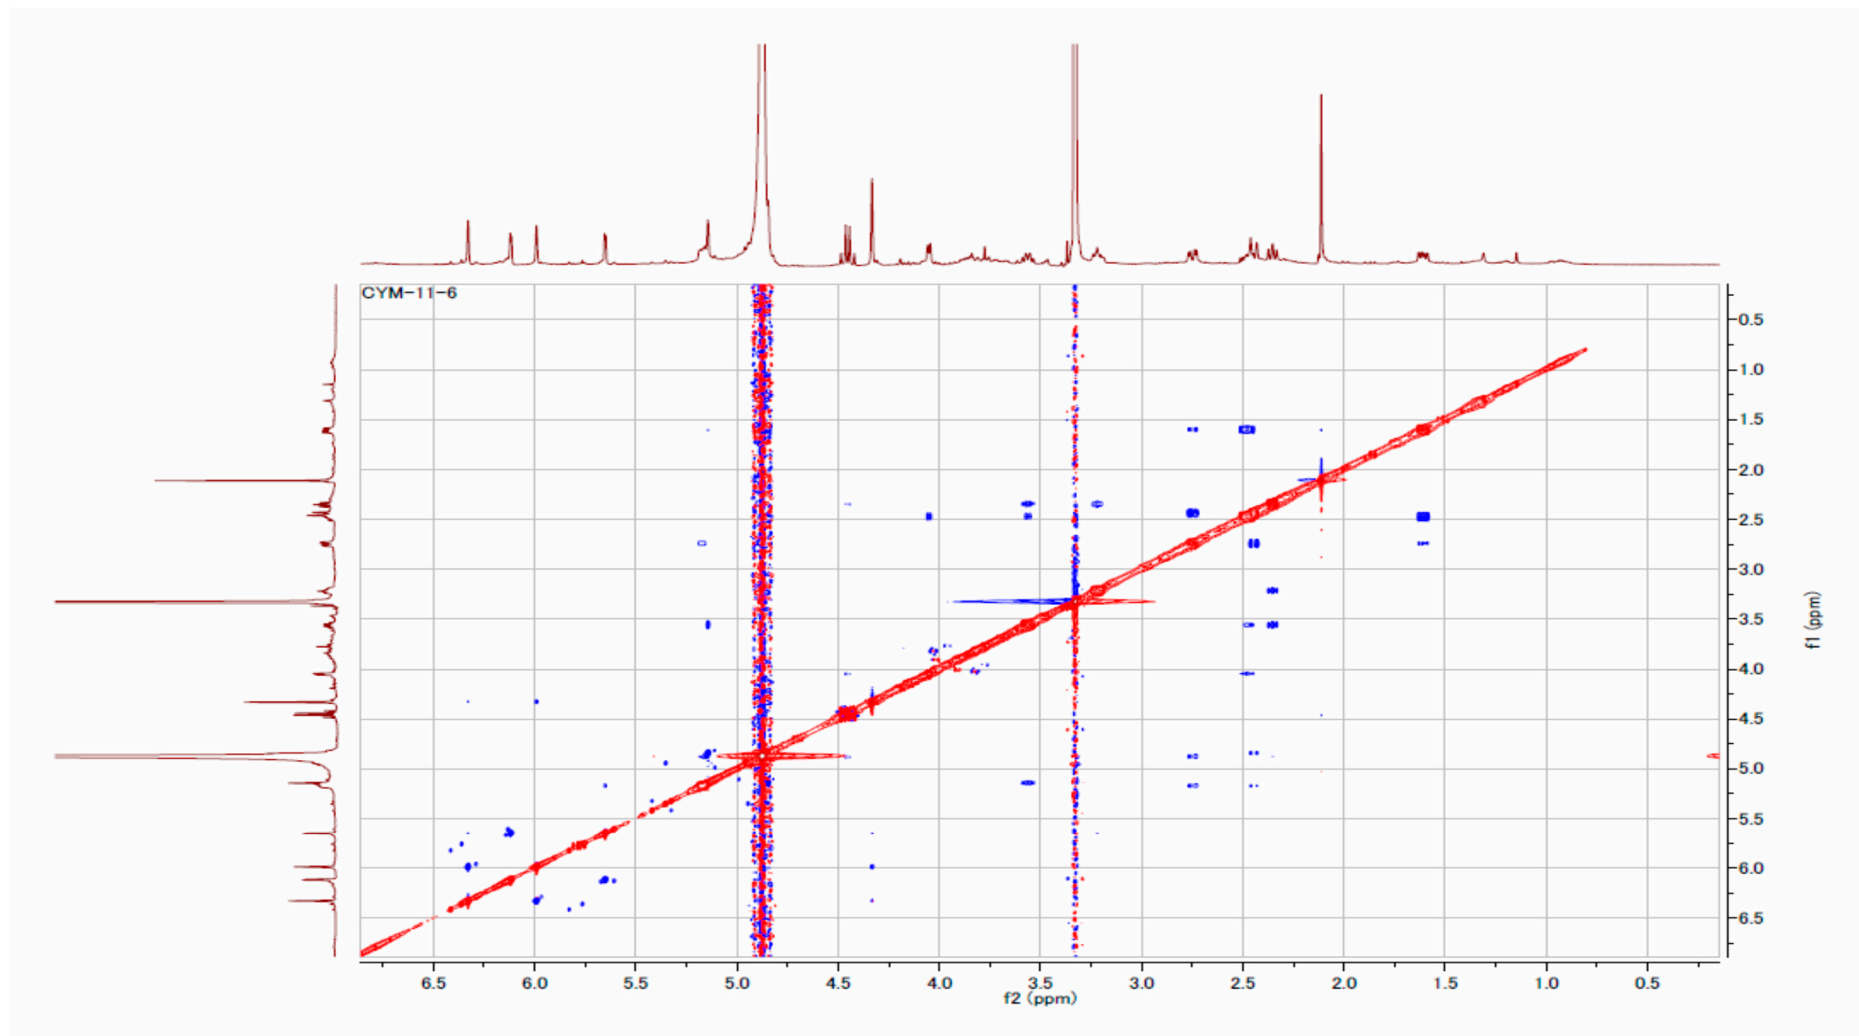

S7:NOESY of 1

Sample : CyM-11-6

Note : MStation

Inlet : Direct      Ion Mode : CI+

RT : 2.11 min      Scan# : 56

Elements : C 150/0, H 250/0, O 50/0

Mass Tolerance    : 5mmu

Unsaturation (U.S.) : 0.0 - 15.0

|   | Observed m/z | Int%  | Err [ppm / mmu] | U.S. Composition |
|---|--------------|-------|-----------------|------------------|
| 1 | 423.1655     | 18.79 | -0.0 / -0.0     | 8.5 C21 H27 O9   |

S8: HRCI/mas of 1

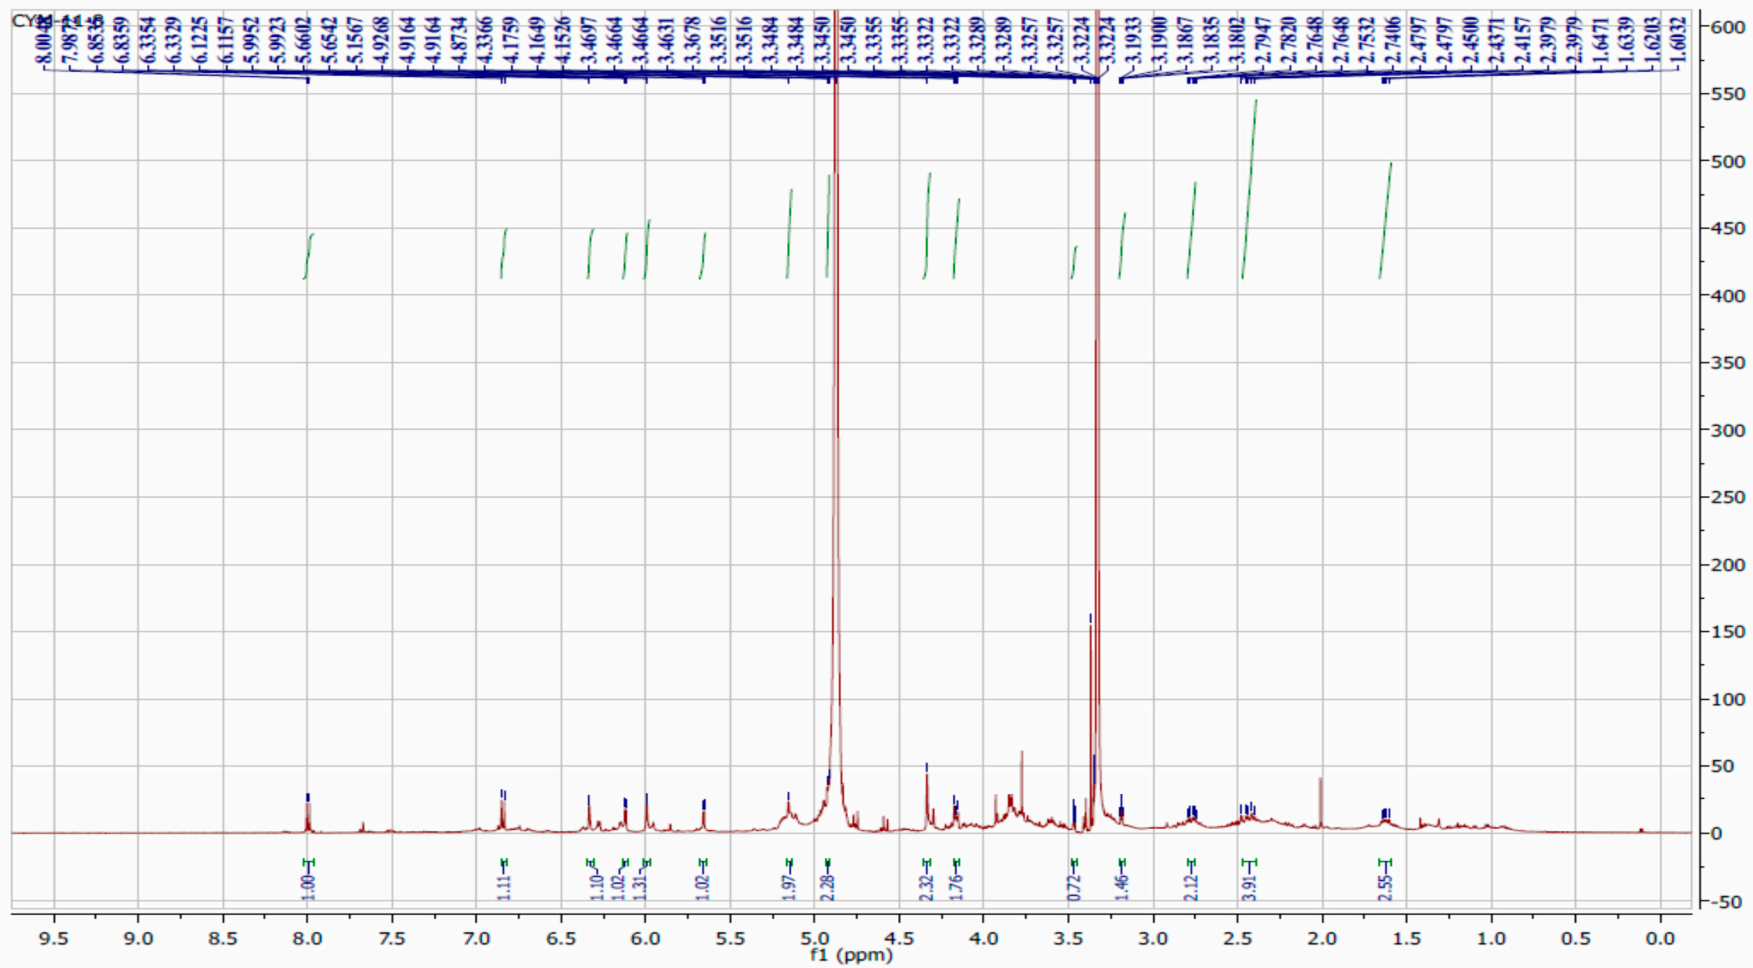

S9:  $^1\text{H}$  NMR ( $\text{CDCl}_3$ , 500 MHz) of **2**

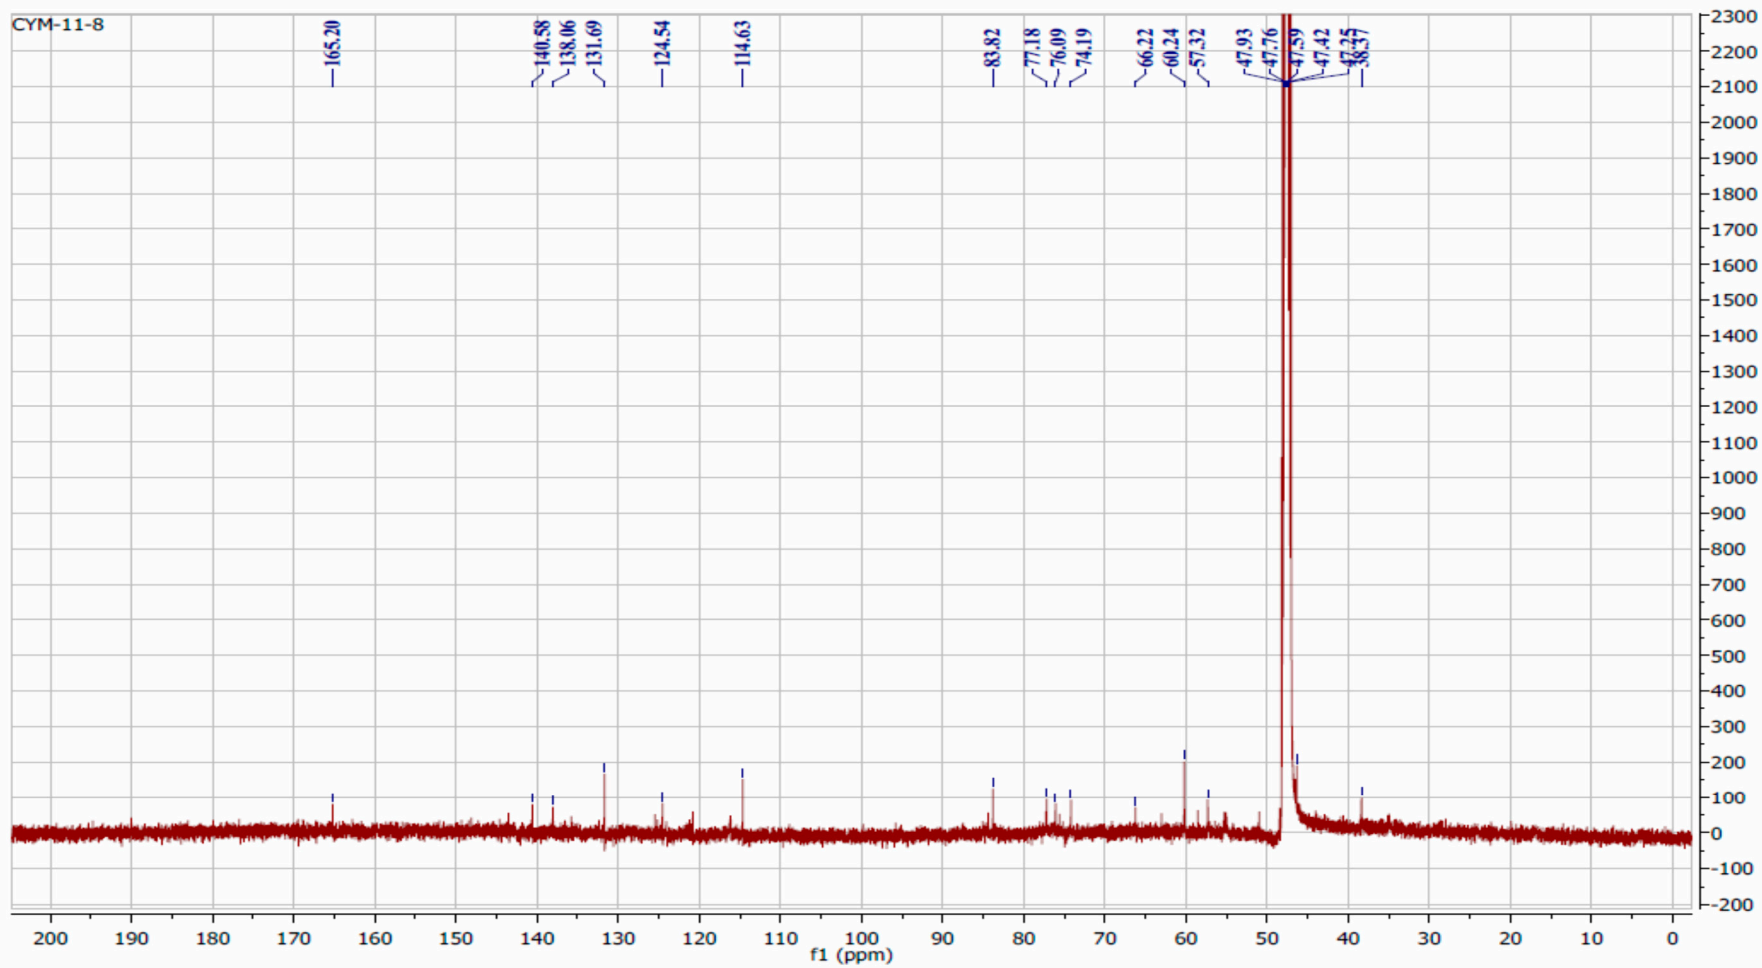

S10:  $^{13}\text{C}$  NMR ( $\text{CDCl}_3$ , 125 MHz) of **2**

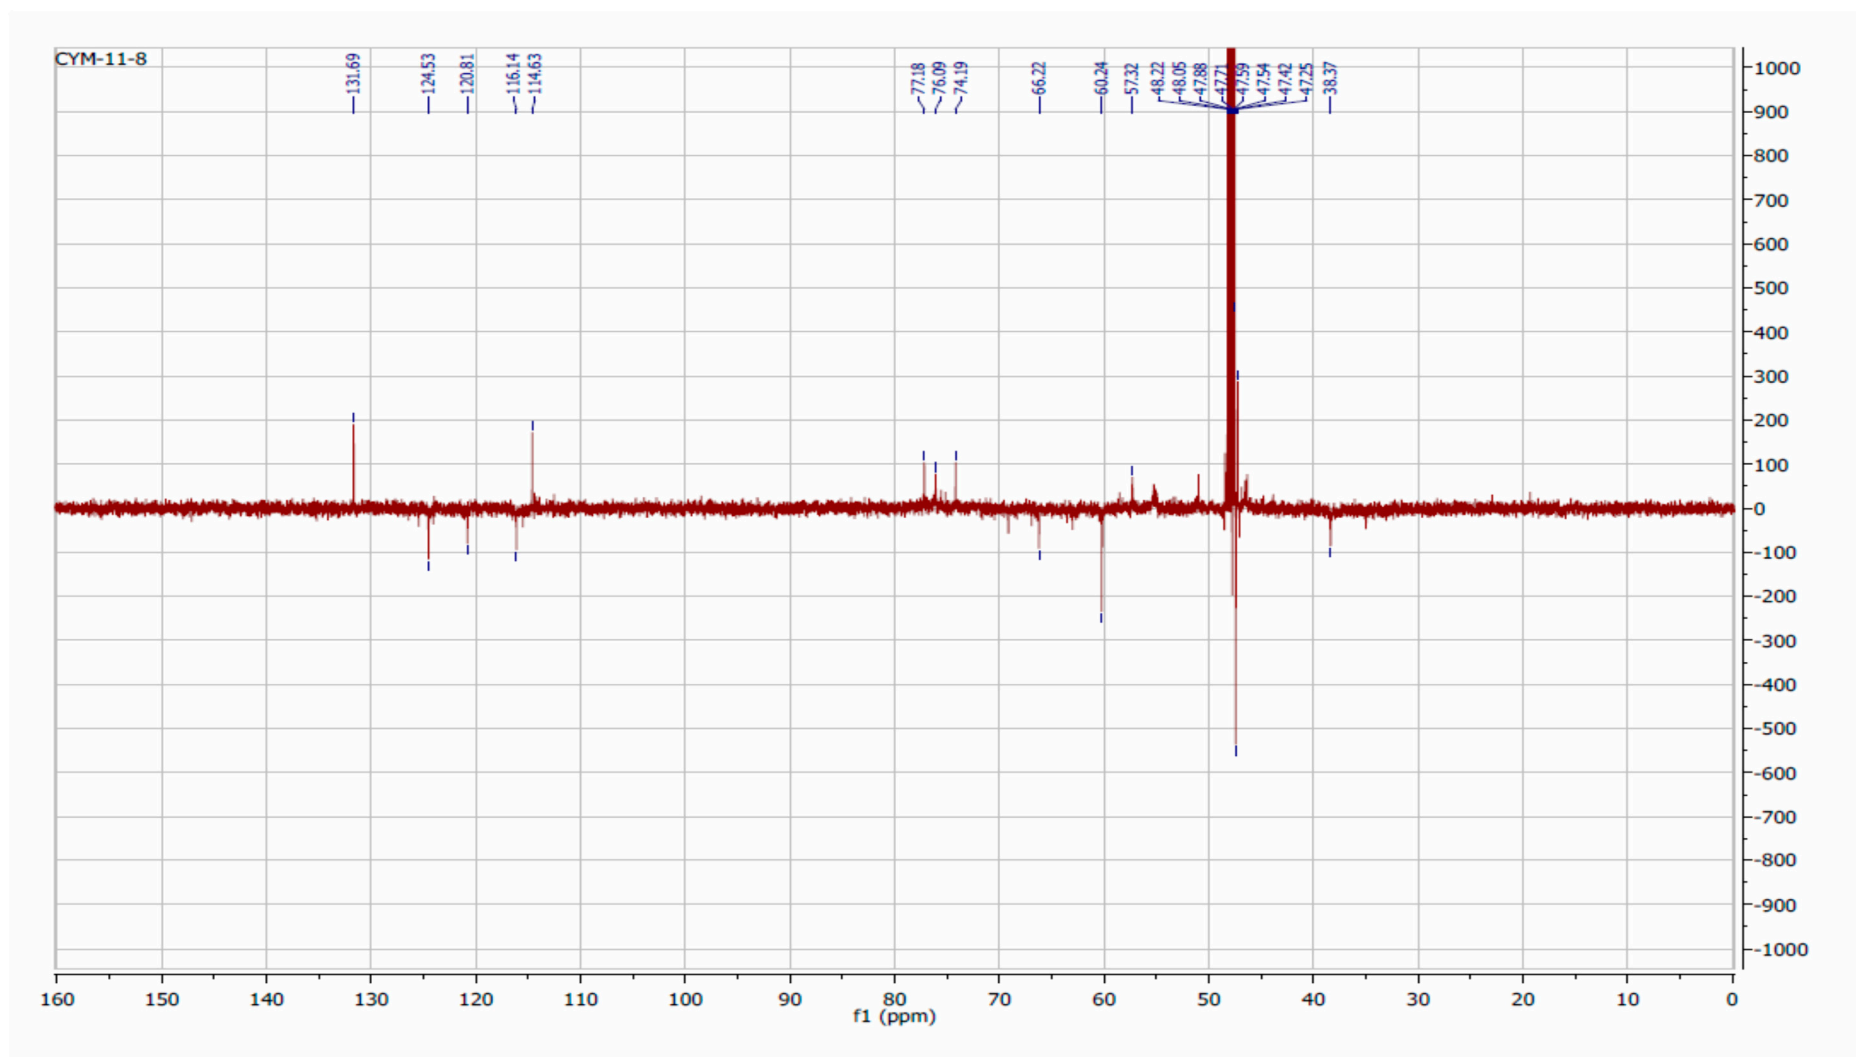

S11:DEPT of 2

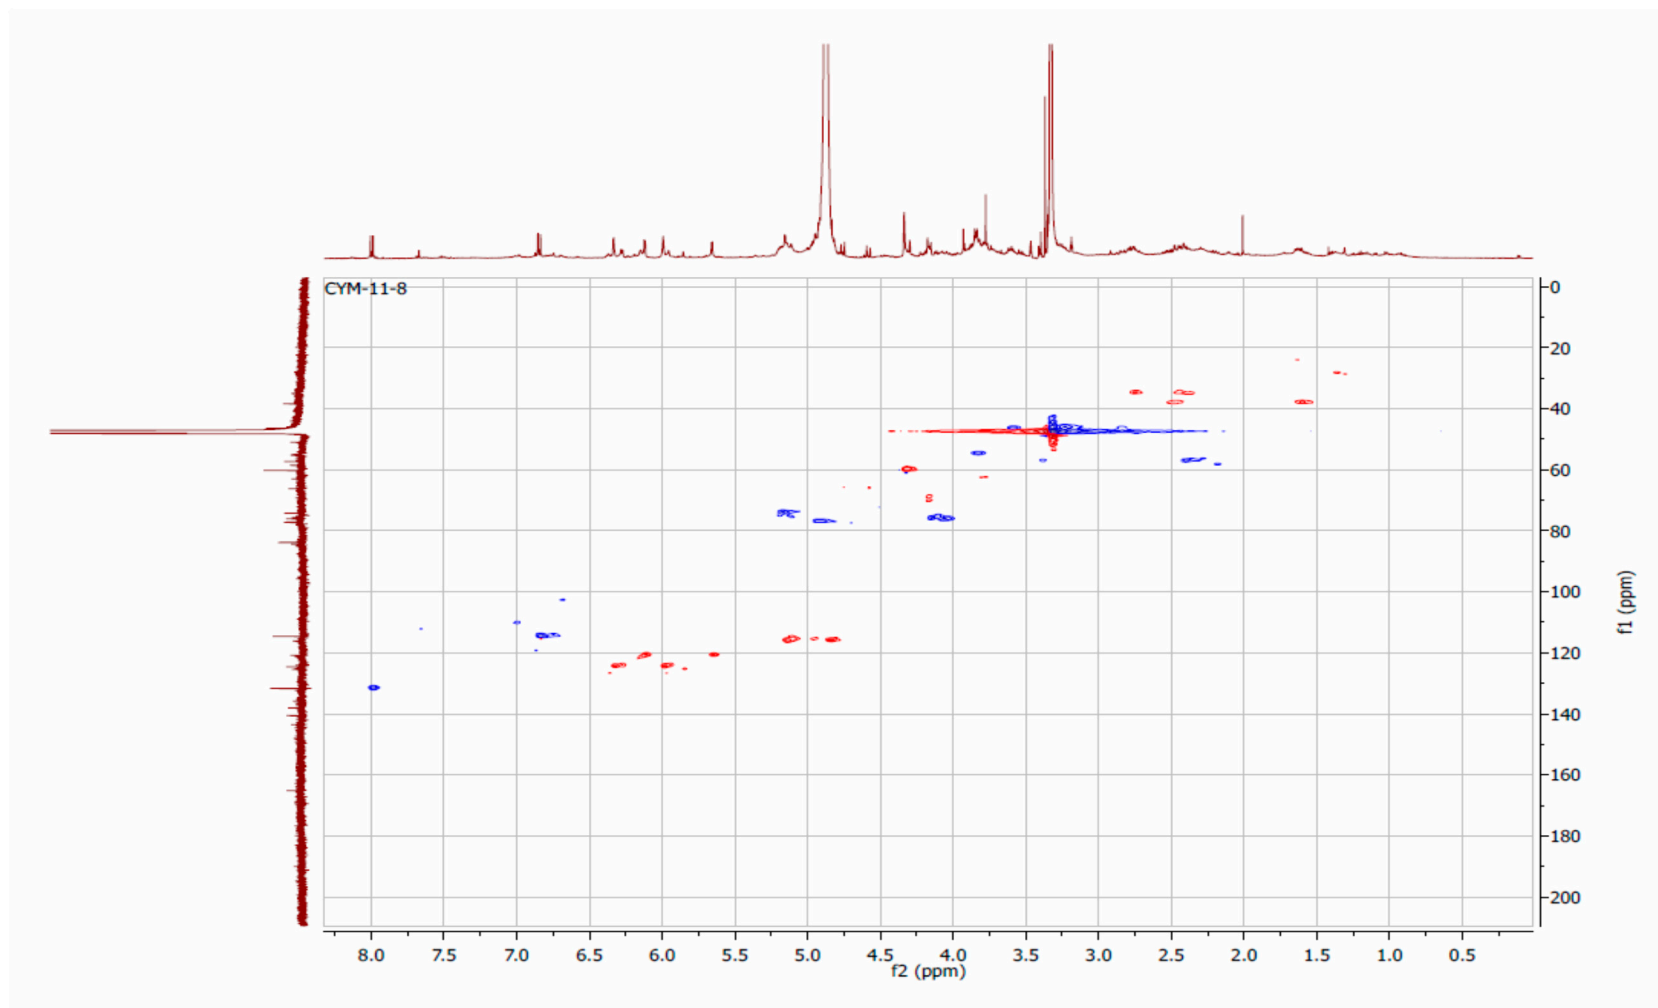

S12:HSQC of 2

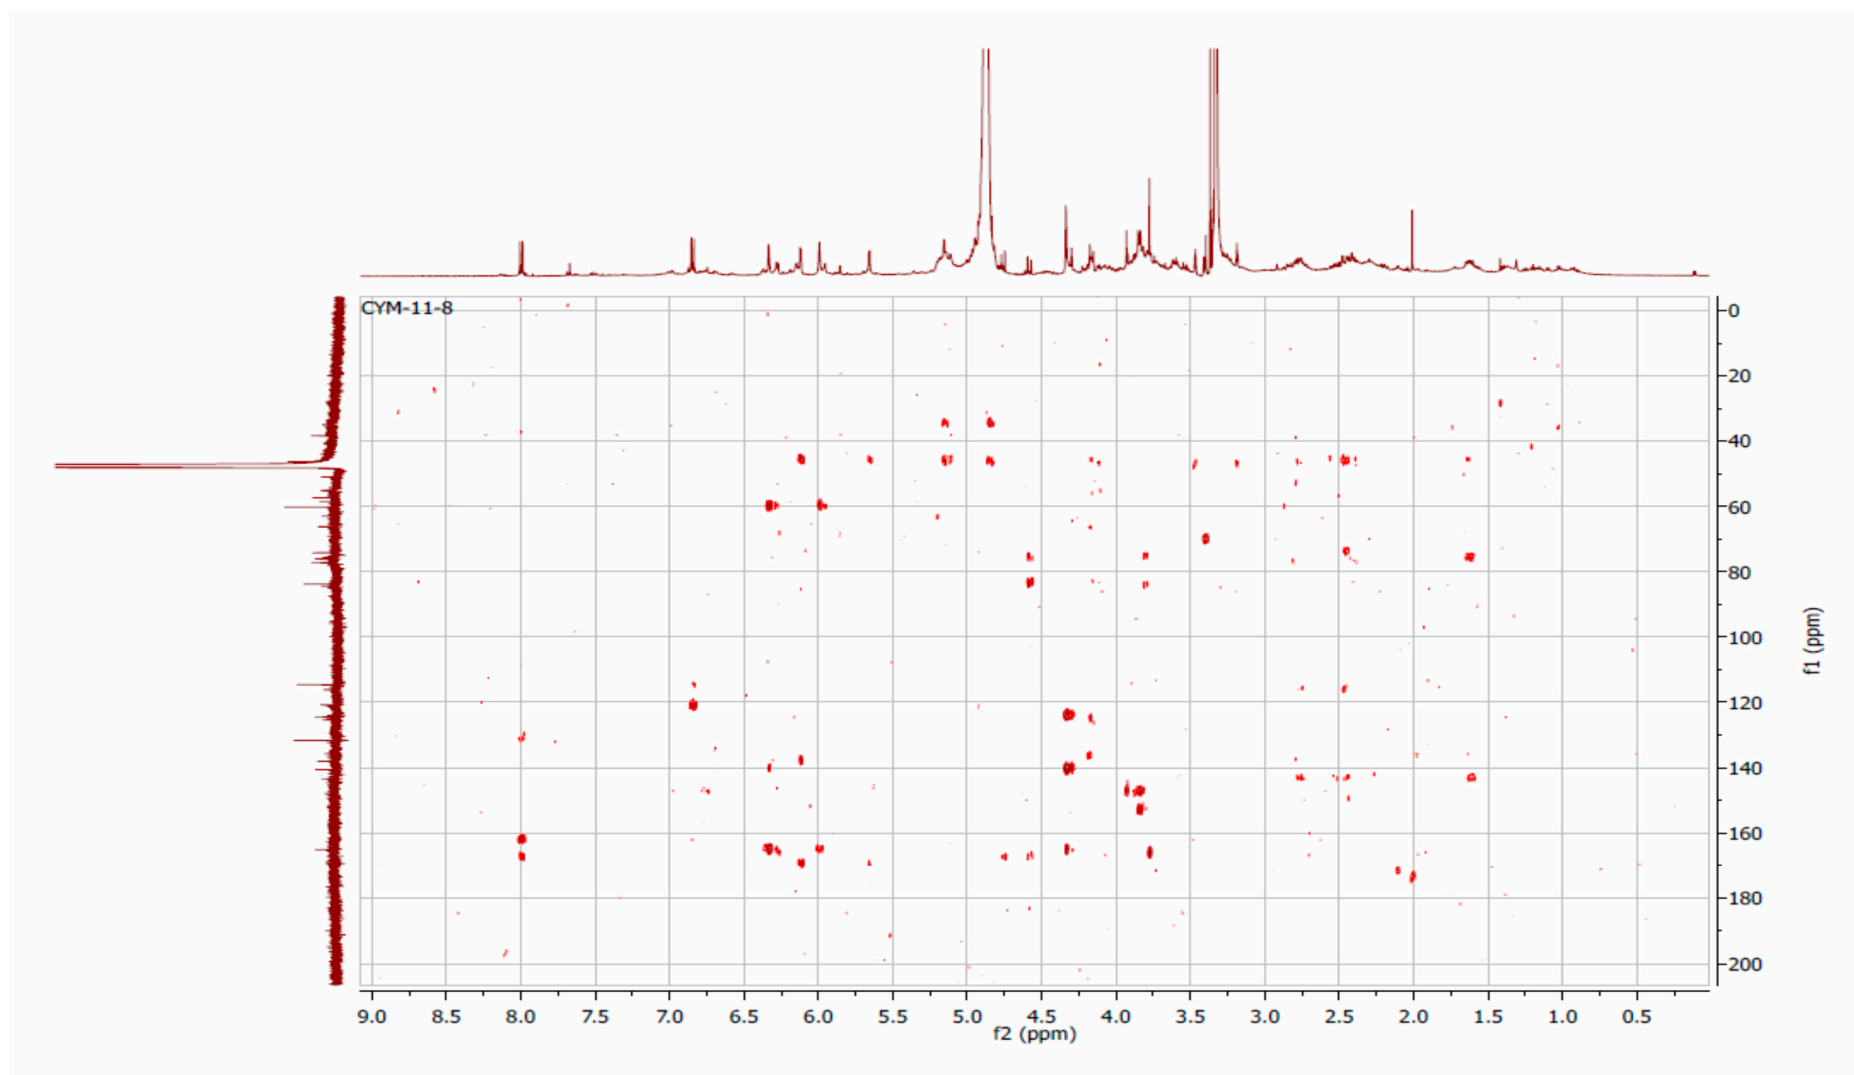

S13:HMBC of 2

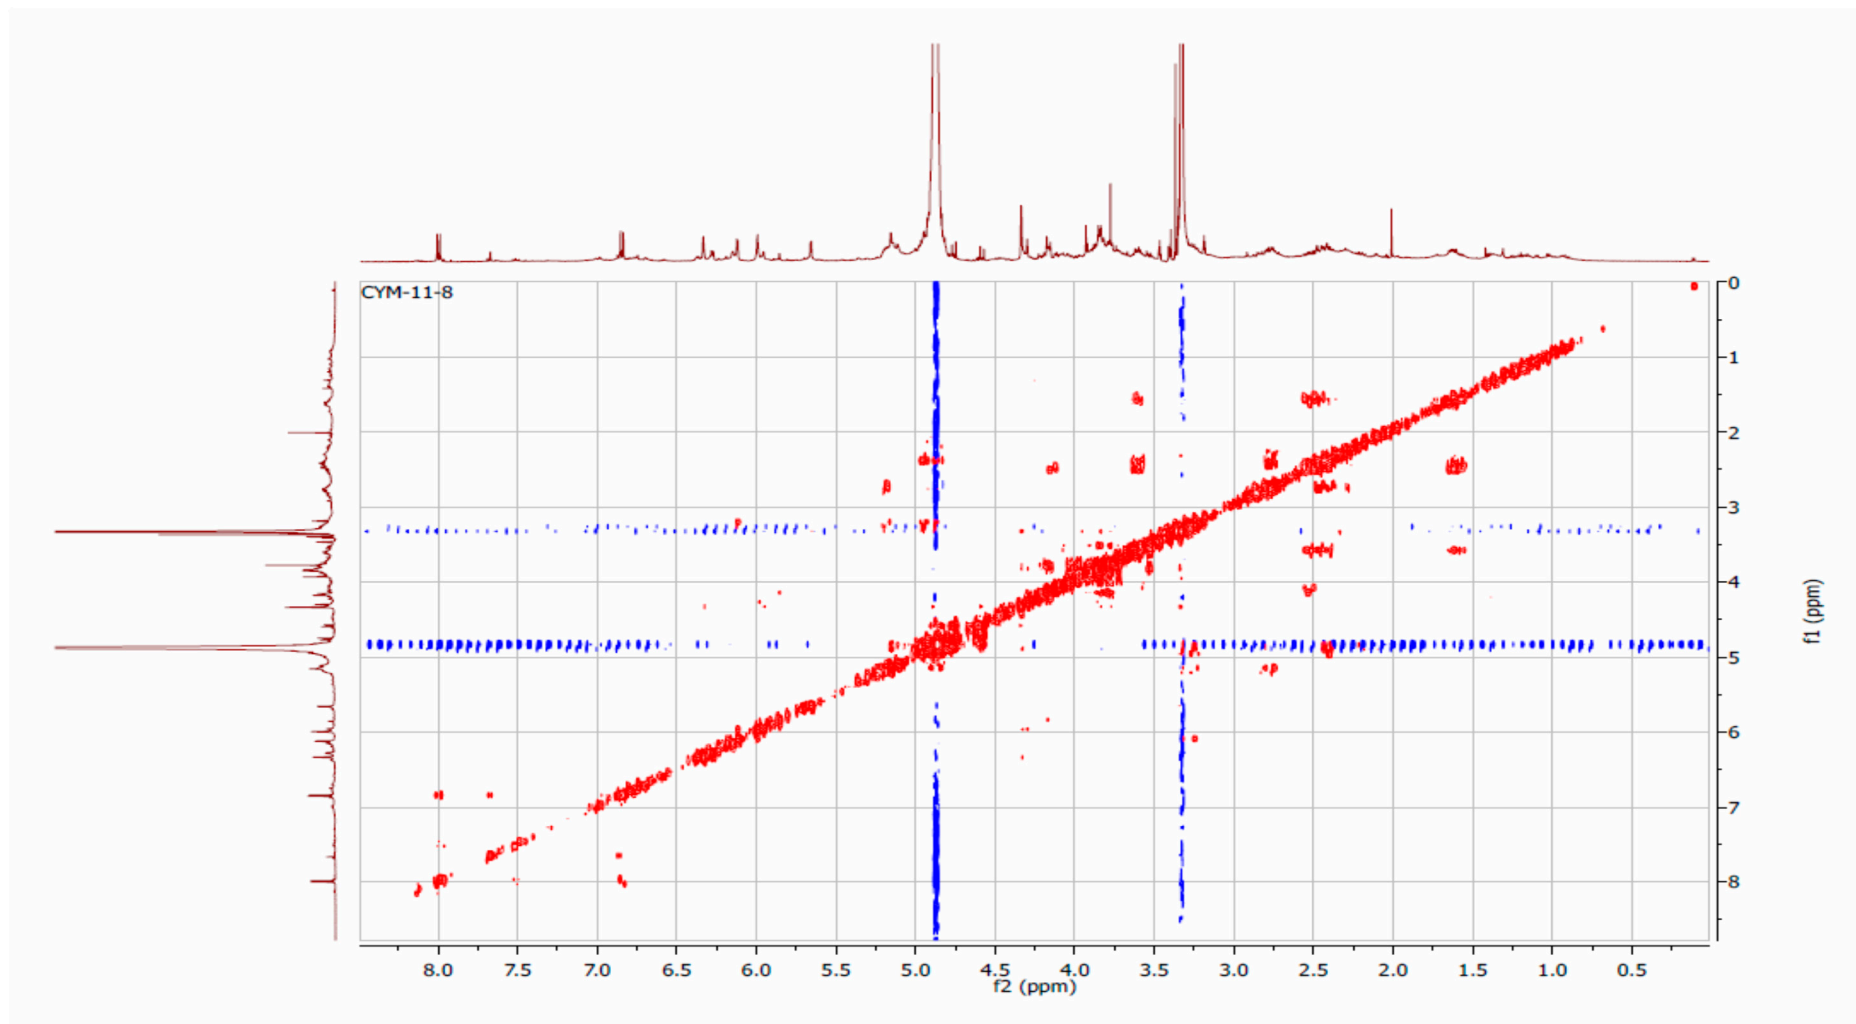

S14:  $^1\text{H}$   $^1\text{H}$  COSY of 2



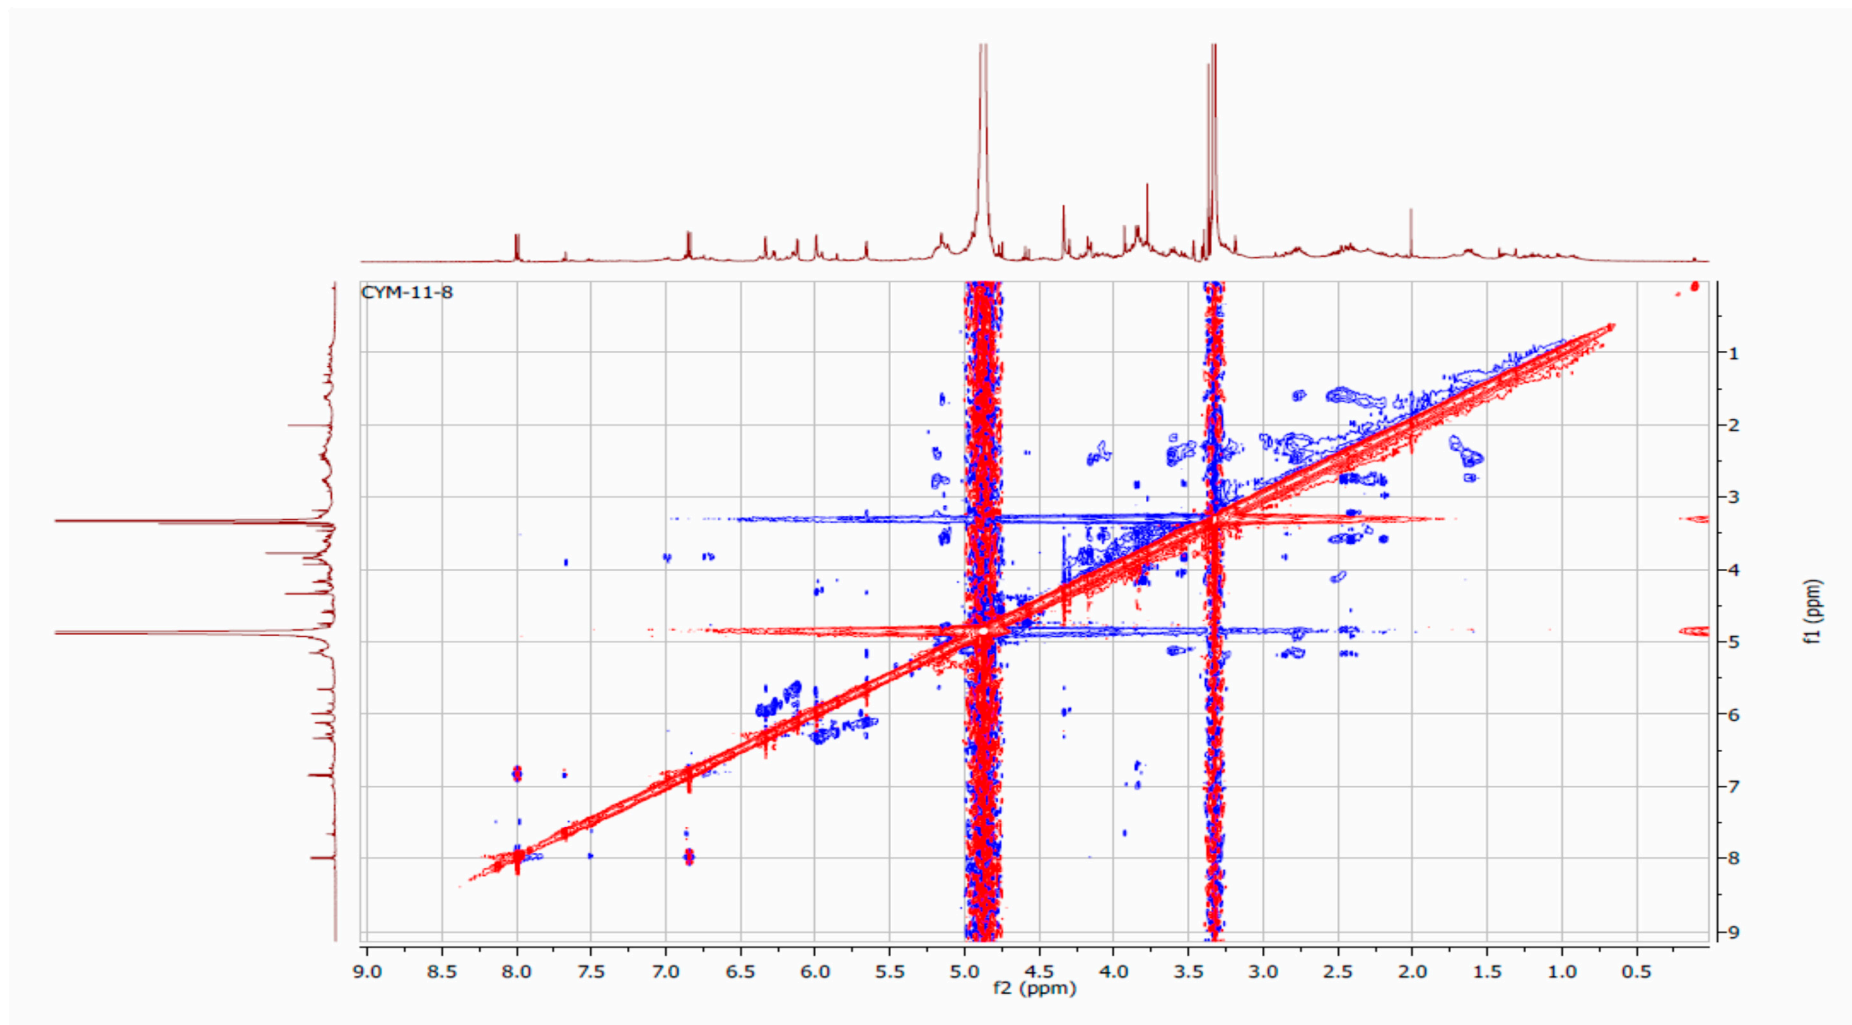

S15:NOESY of 2

Sample : CyM-11-8  
 Note : MStation  
 Inlet : Direct Ion Mode : CI+  
 RT : 2.26 min Scan# : 60  
 Elements : C 150/0, H 250/0, O 50/0  
 Mass Tolerance : 5mmu  
 Unsaturation (U.S.) : 0.0 - 15.0

|   | Observed m/z | Int% | Err [ppm / mmu] | U.S. | Composition |
|---|--------------|------|-----------------|------|-------------|
| 1 | 472.1758     | 1.34 | +5.2 / +2.5     | 12.0 | C25 H28 O9  |
| 2 |              |      | -7.2 / -3.4     | 3.0  | C18 H32 O14 |

S 16: HRCI/mas of 2

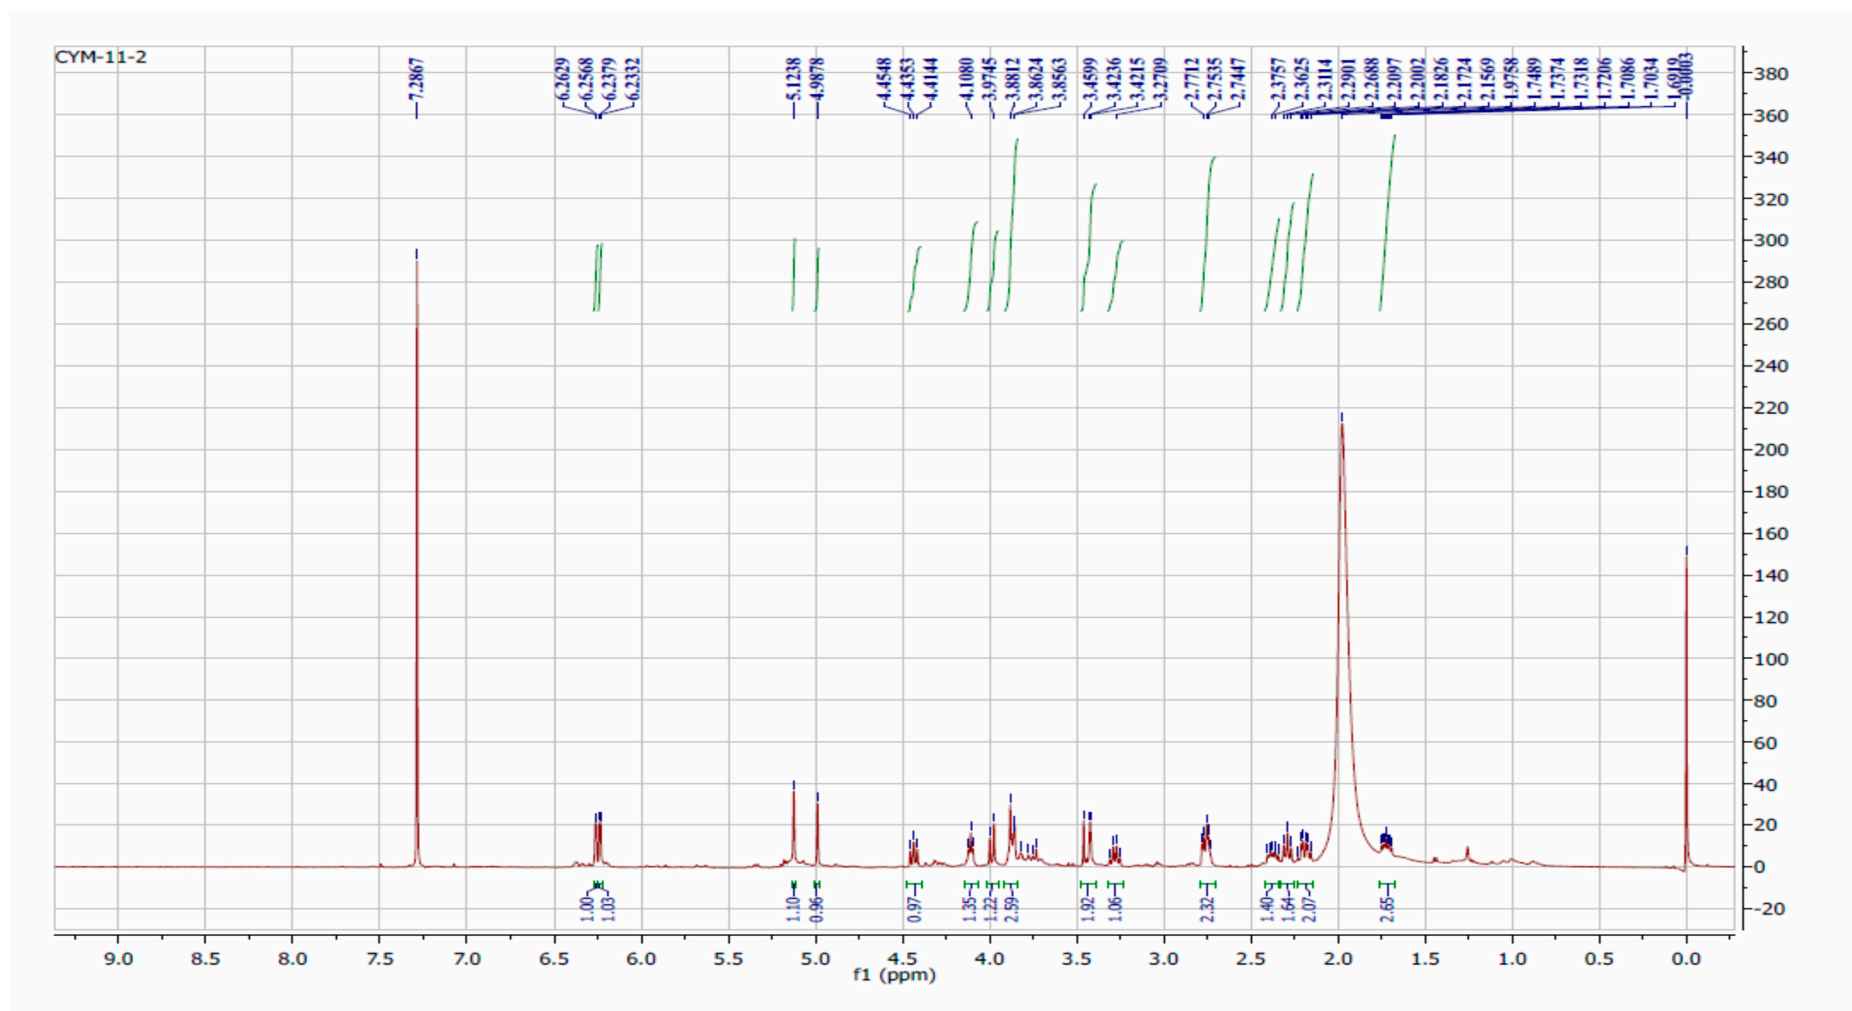

S17:  $^1\text{H}$  NMR ( $\text{CDCl}_3$ , 500 MHz) of **3**

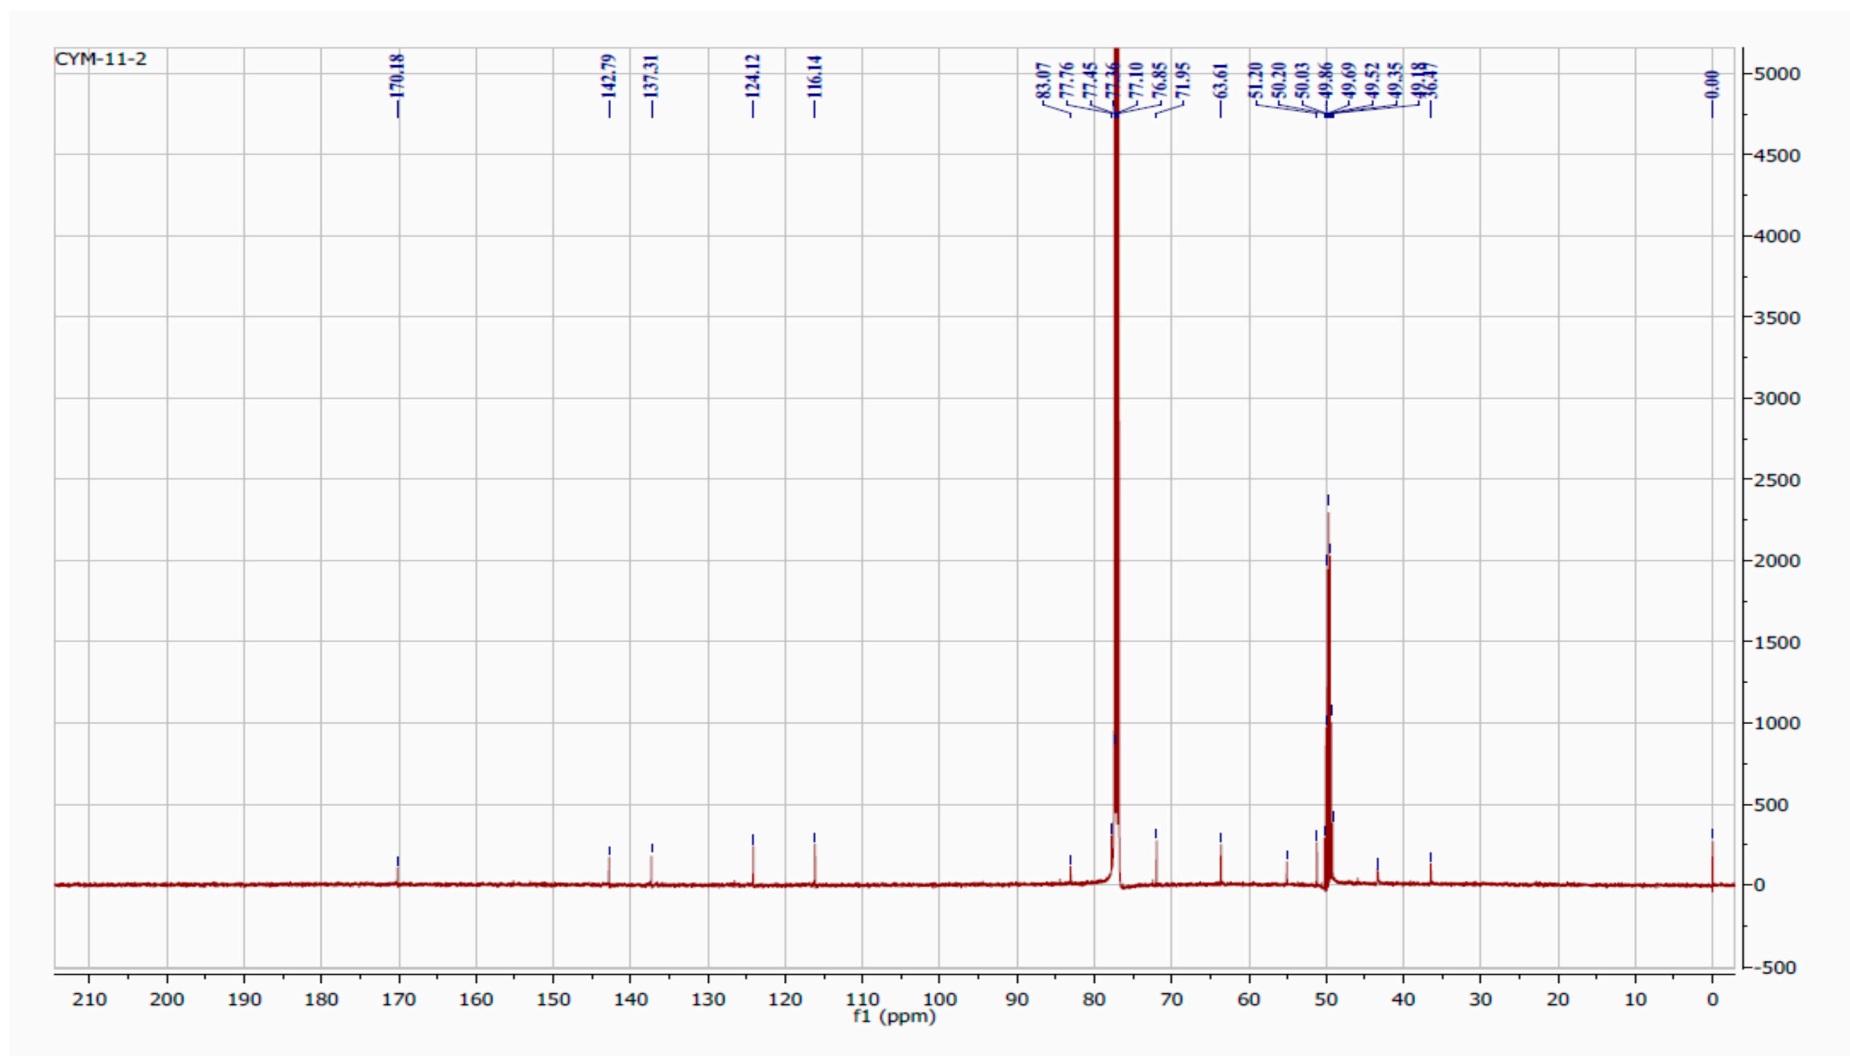

S18:  $^{13}\text{C}$  NMR ( $\text{C}_5\text{D}_5\text{N}$ , 125 MHz) of **3**

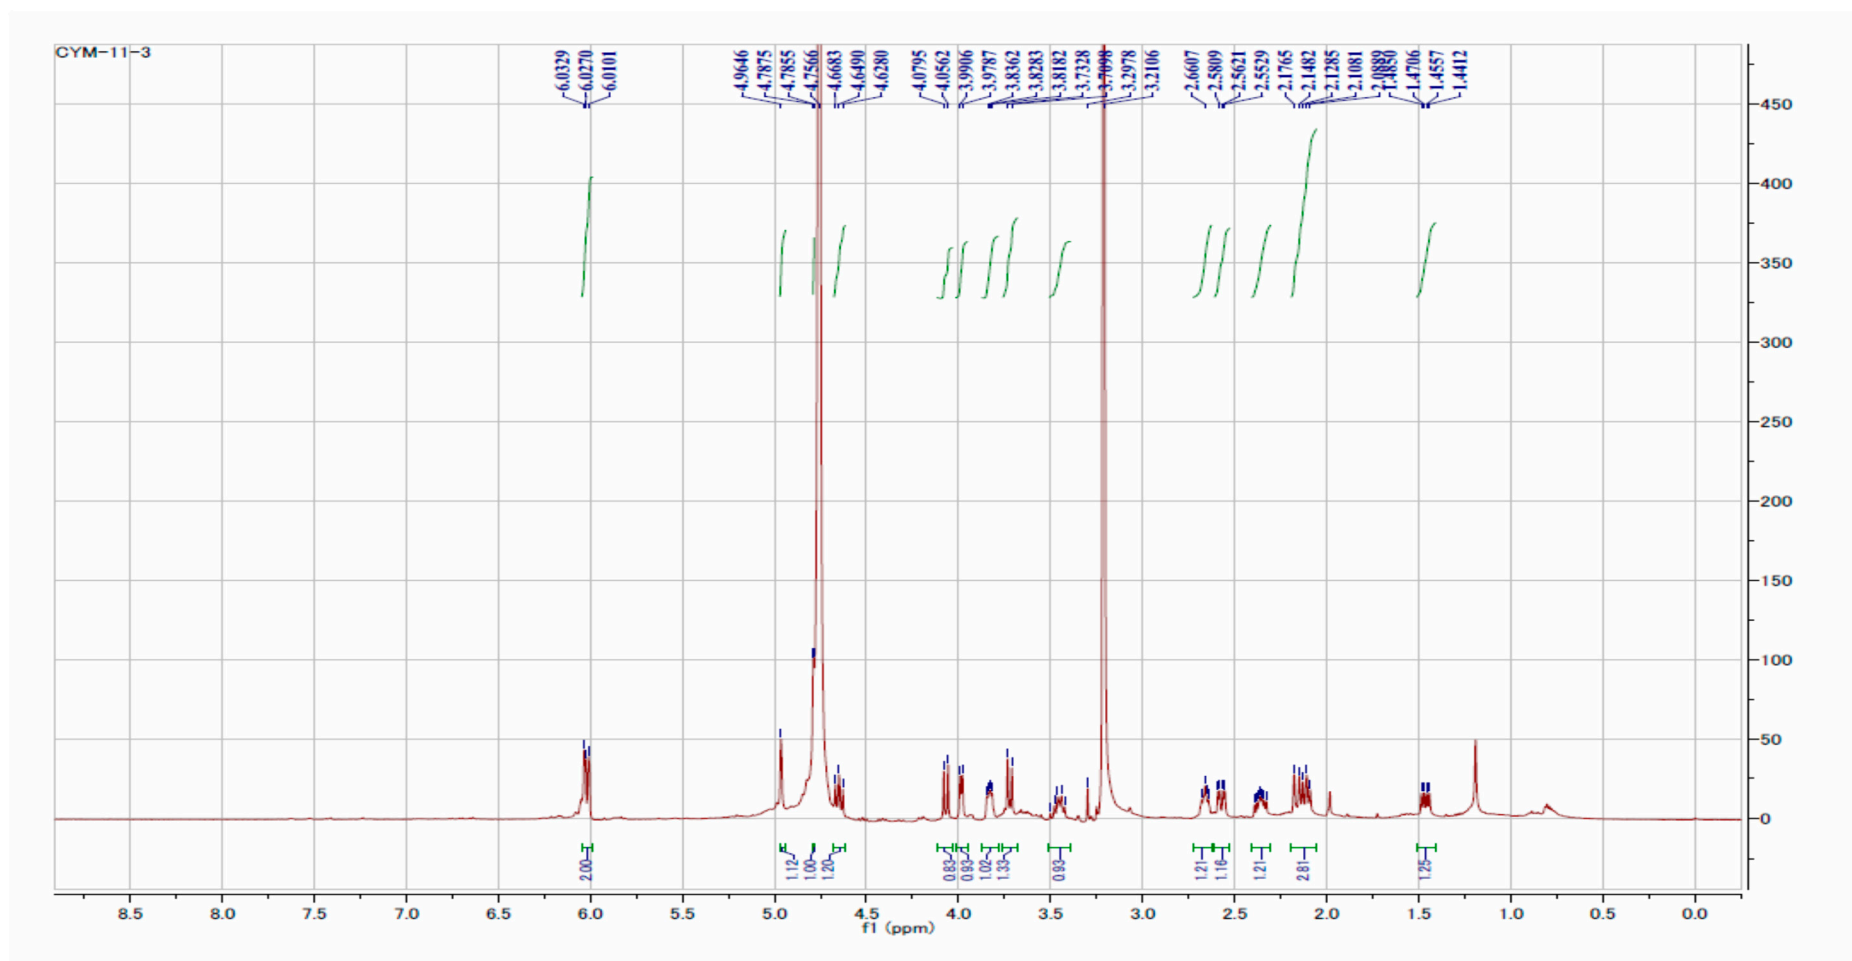

S19:  $^1\text{H}$  NMR ( $\text{CDCl}_3$ , 500 MHz) of **4**

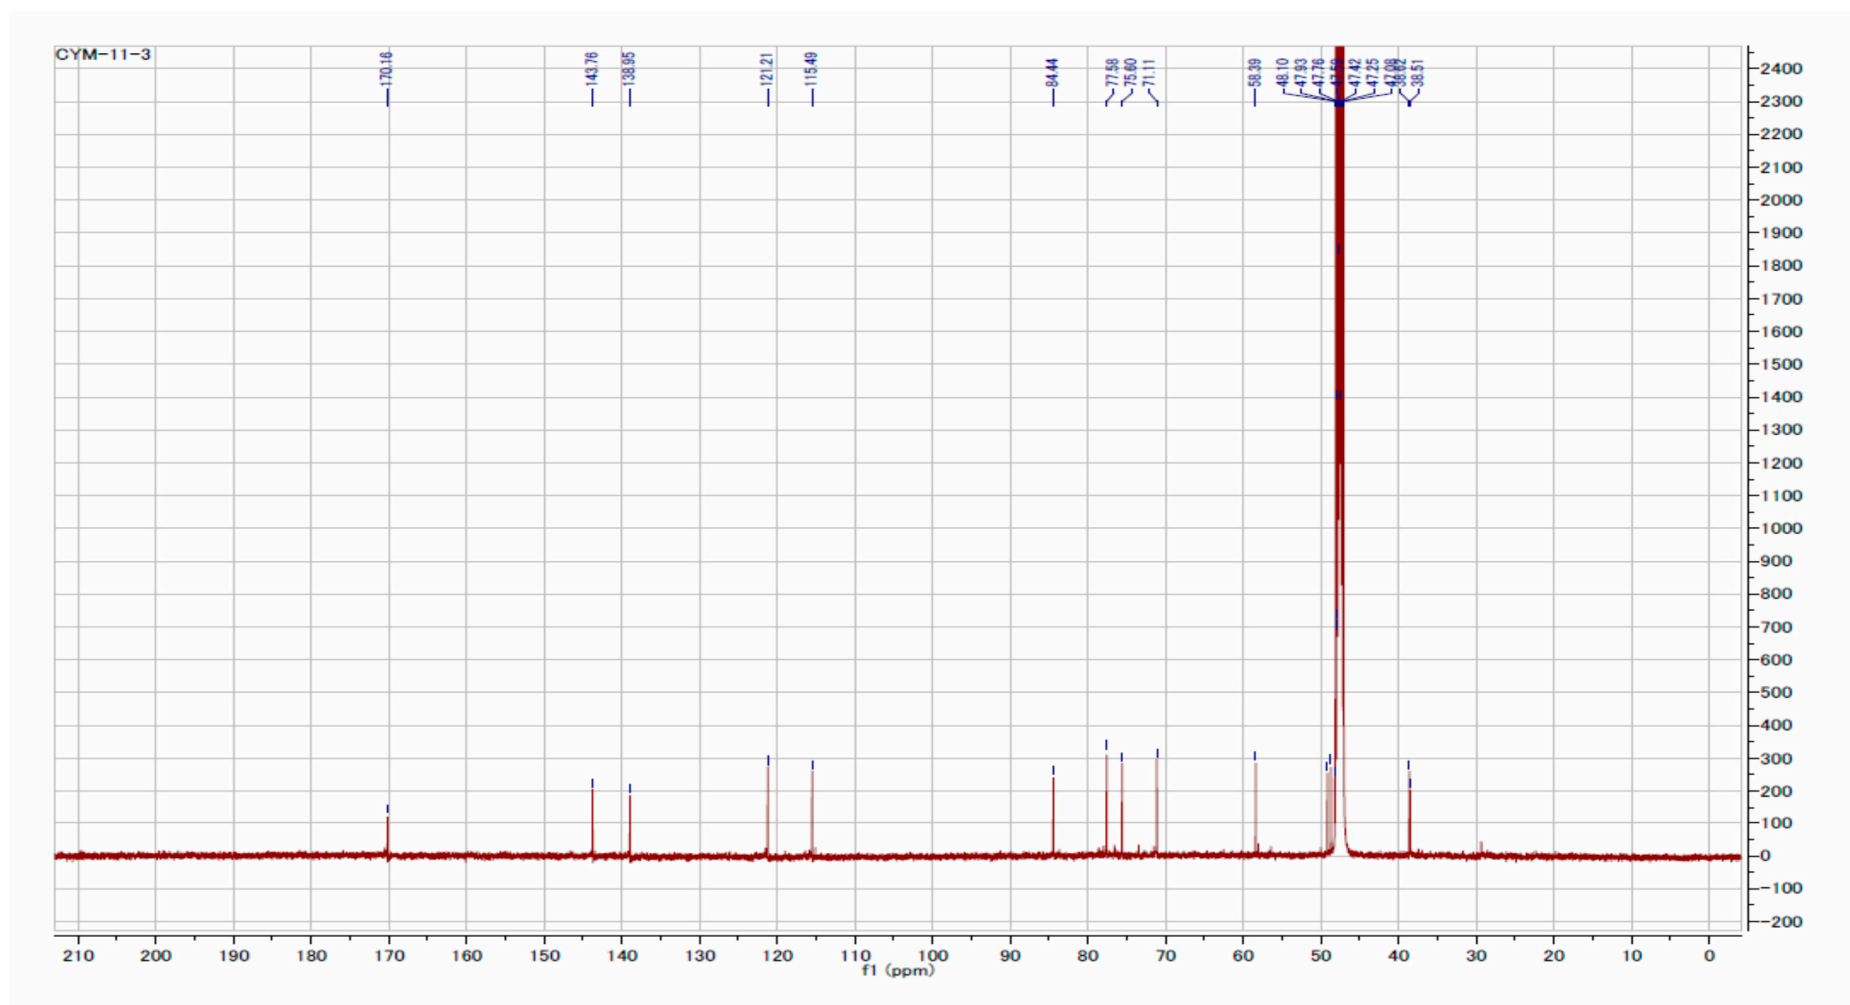

S20:  $^{13}\text{C}$  NMR ( $\text{C}_5\text{D}_5\text{N}$ , 125 MHz) of 4

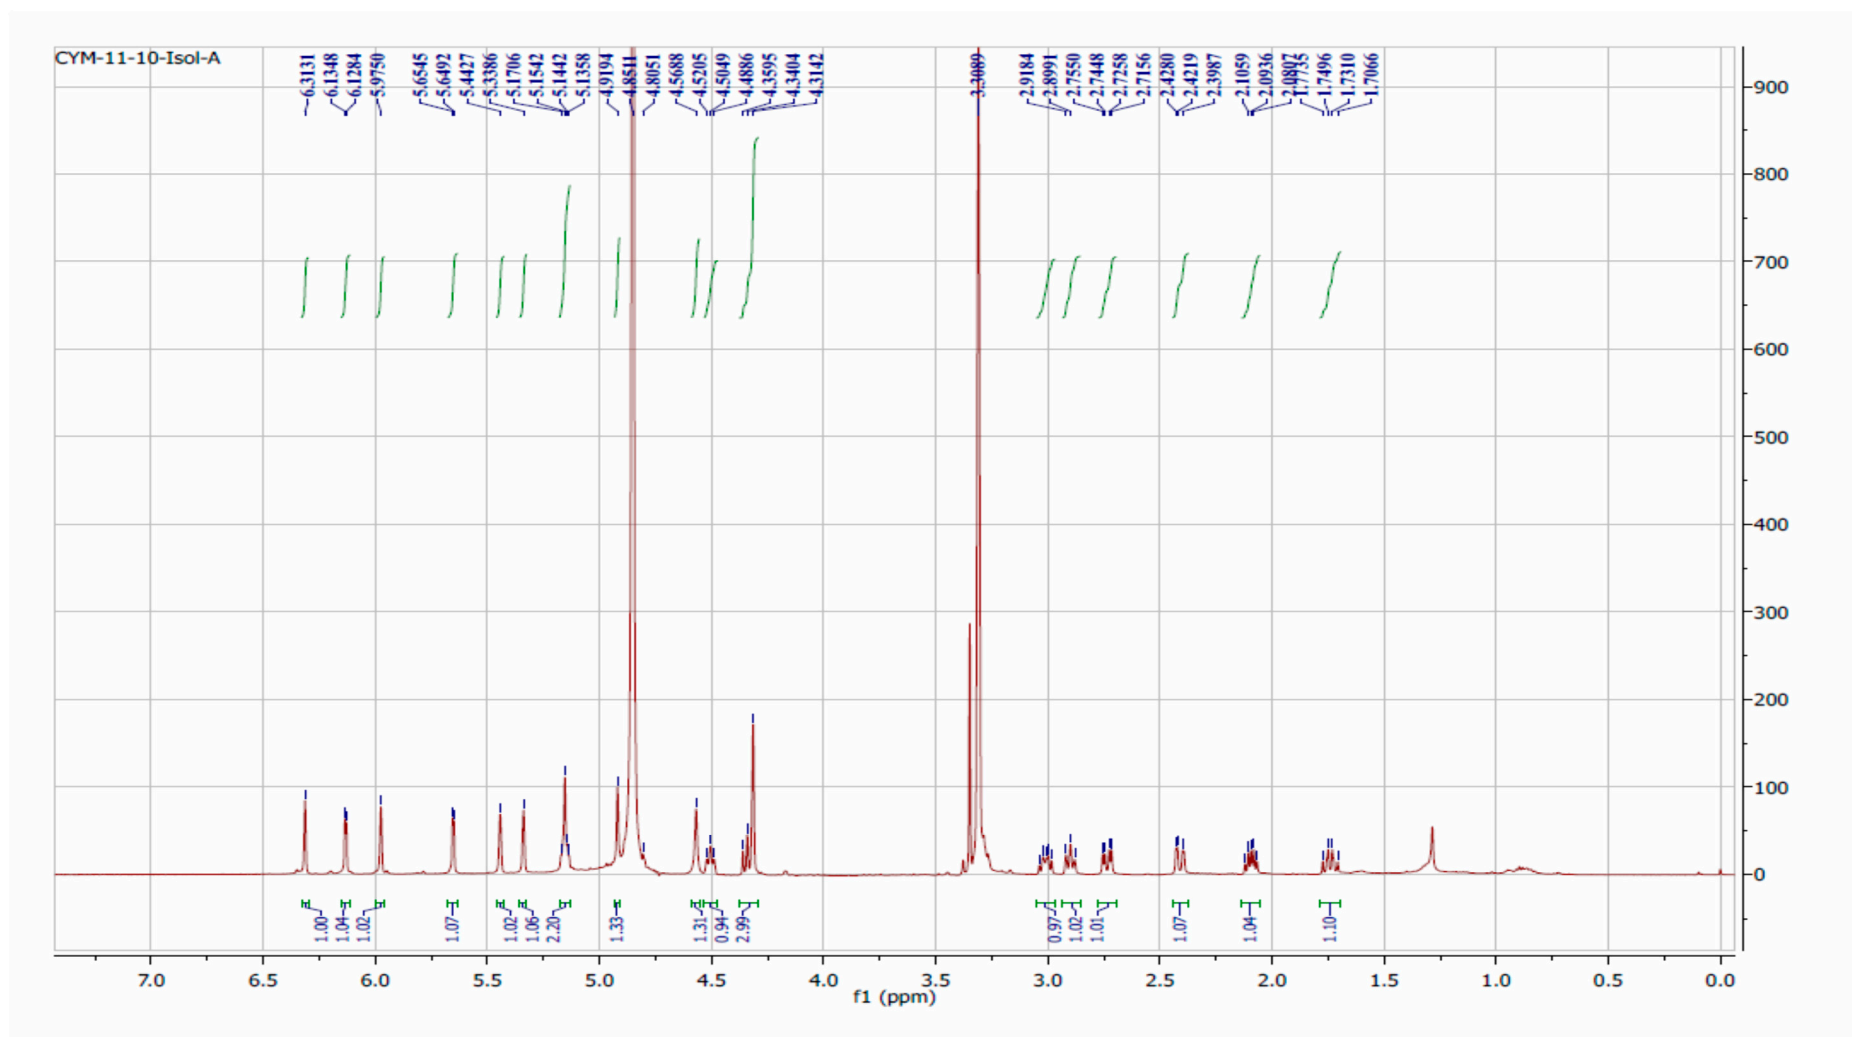

S21:<sup>1</sup>H NMR (CDCl<sub>3</sub>, 500 MHz) of **5**

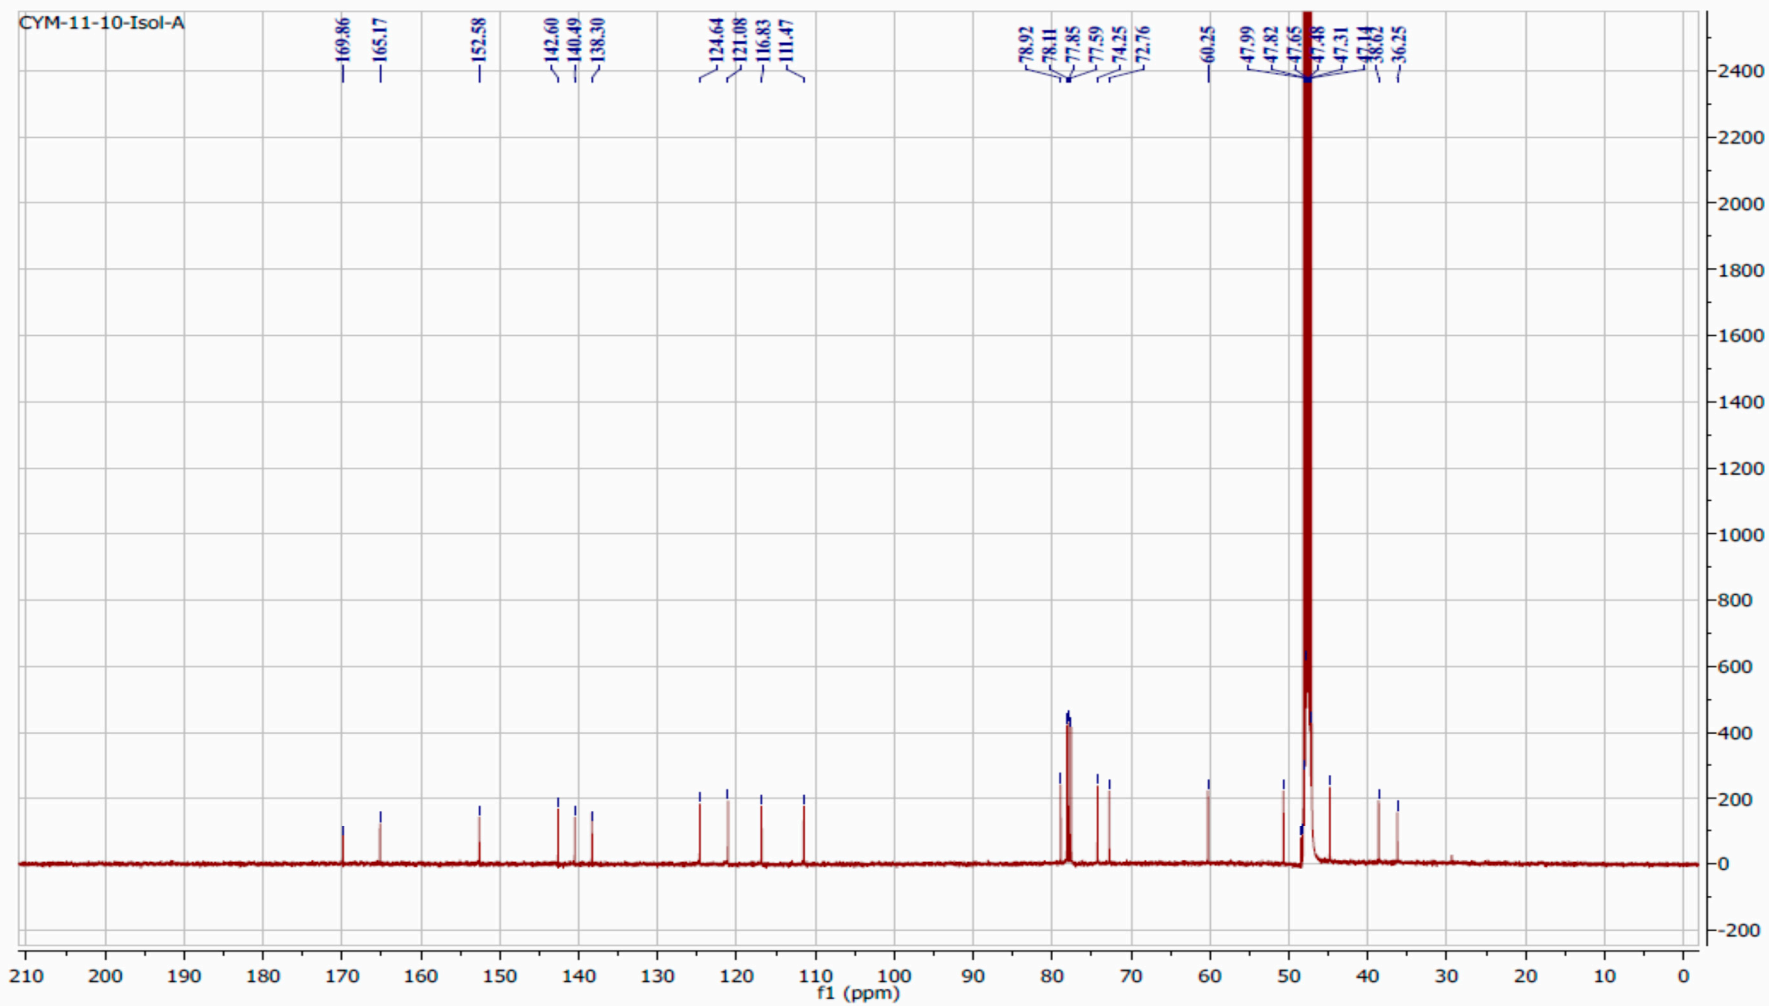

S22:  $^{13}\text{C}$  NMR ( $\text{C}_5\text{D}_5\text{N}$ , 125 MHz) of **5**



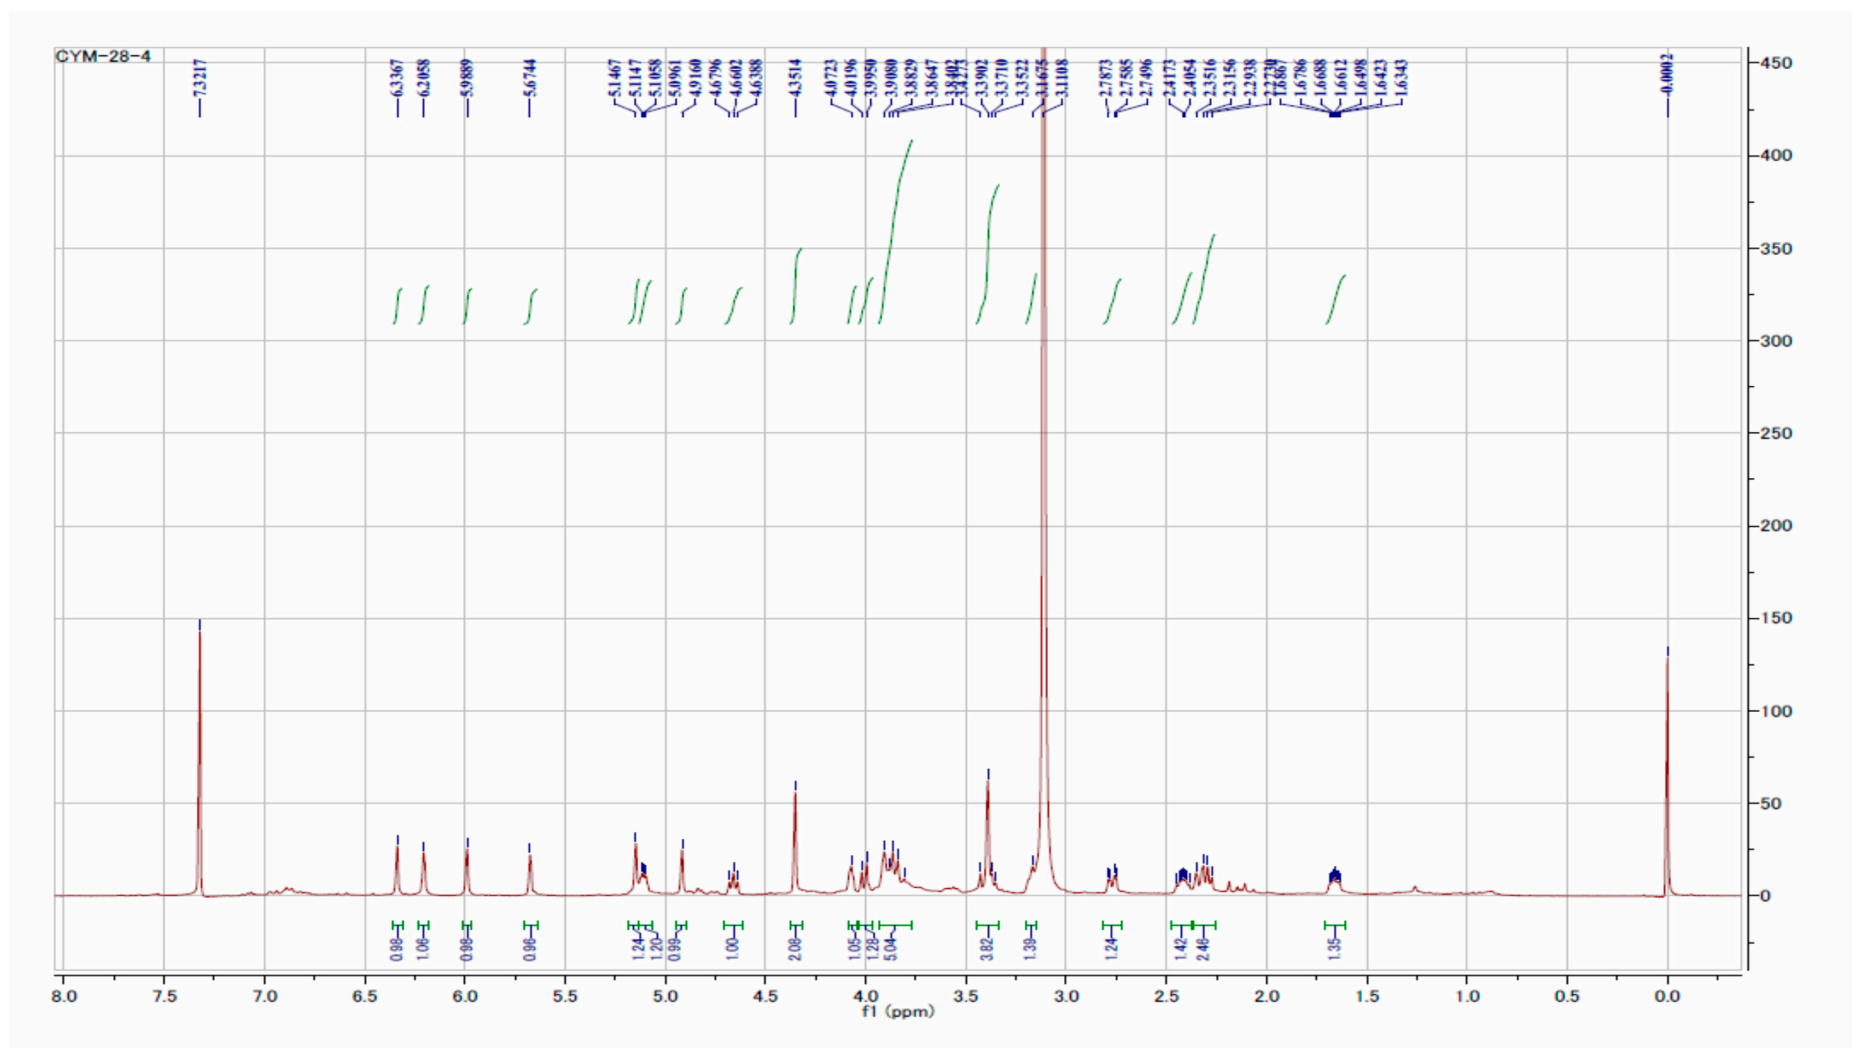

S23:  $^1\text{H}$  NMR ( $\text{CDCl}_3$ , 500 MHz) of **6**

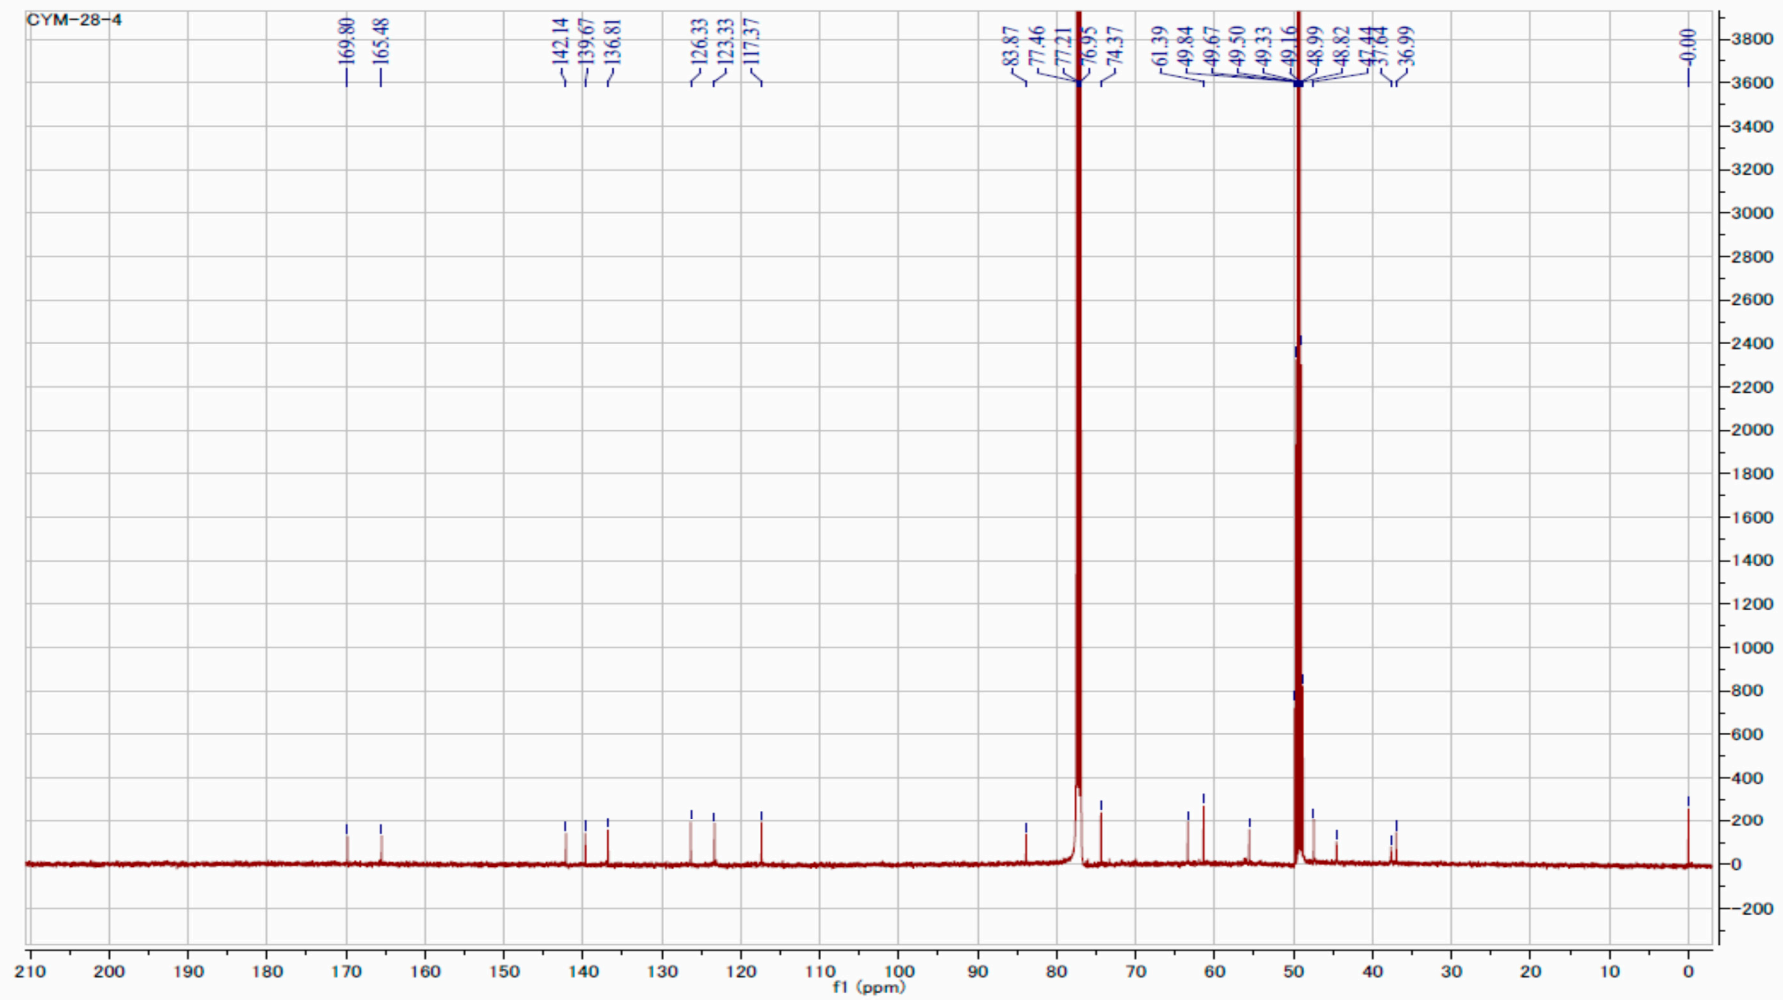

S24:  $^{13}\text{C}$  NMR ( $\text{C}_5\text{D}_5\text{N}$ , 125 MHz) of **6**

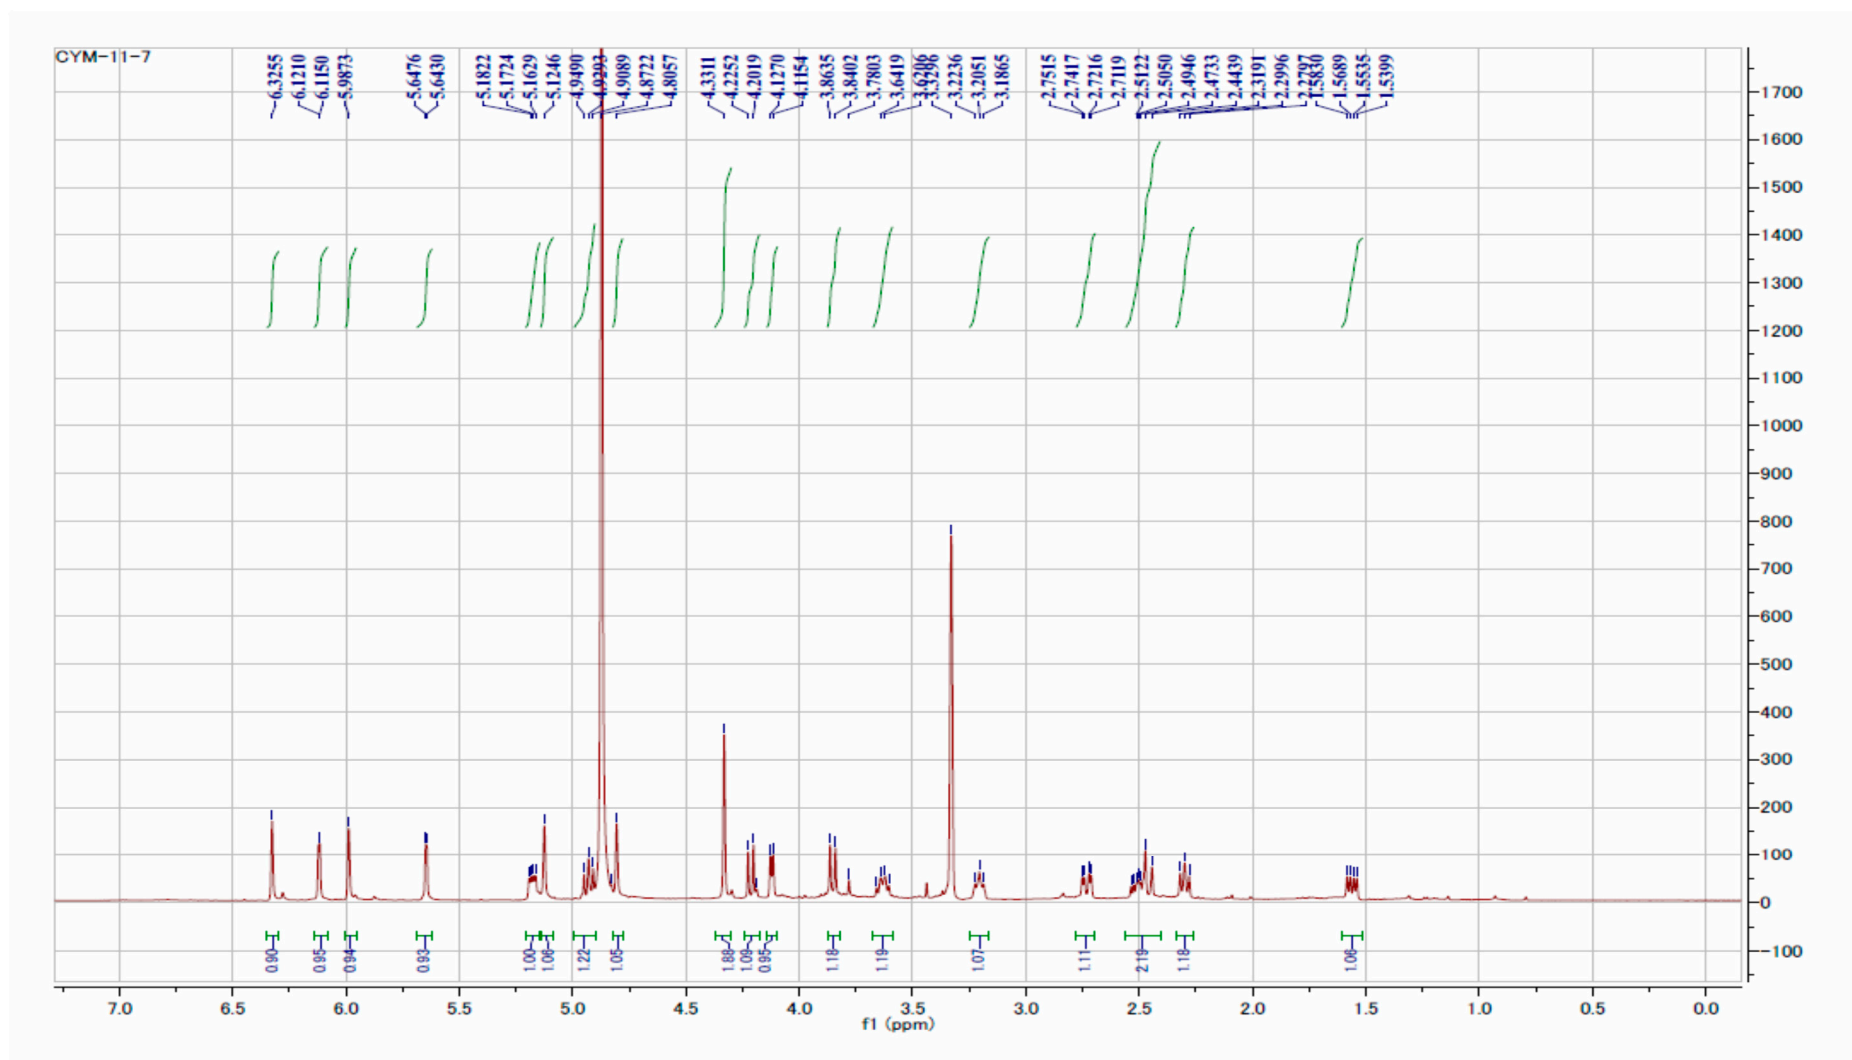

S25:  $^1\text{H}$  NMR ( $\text{CDCl}_3$ , 500 MHz) of 7

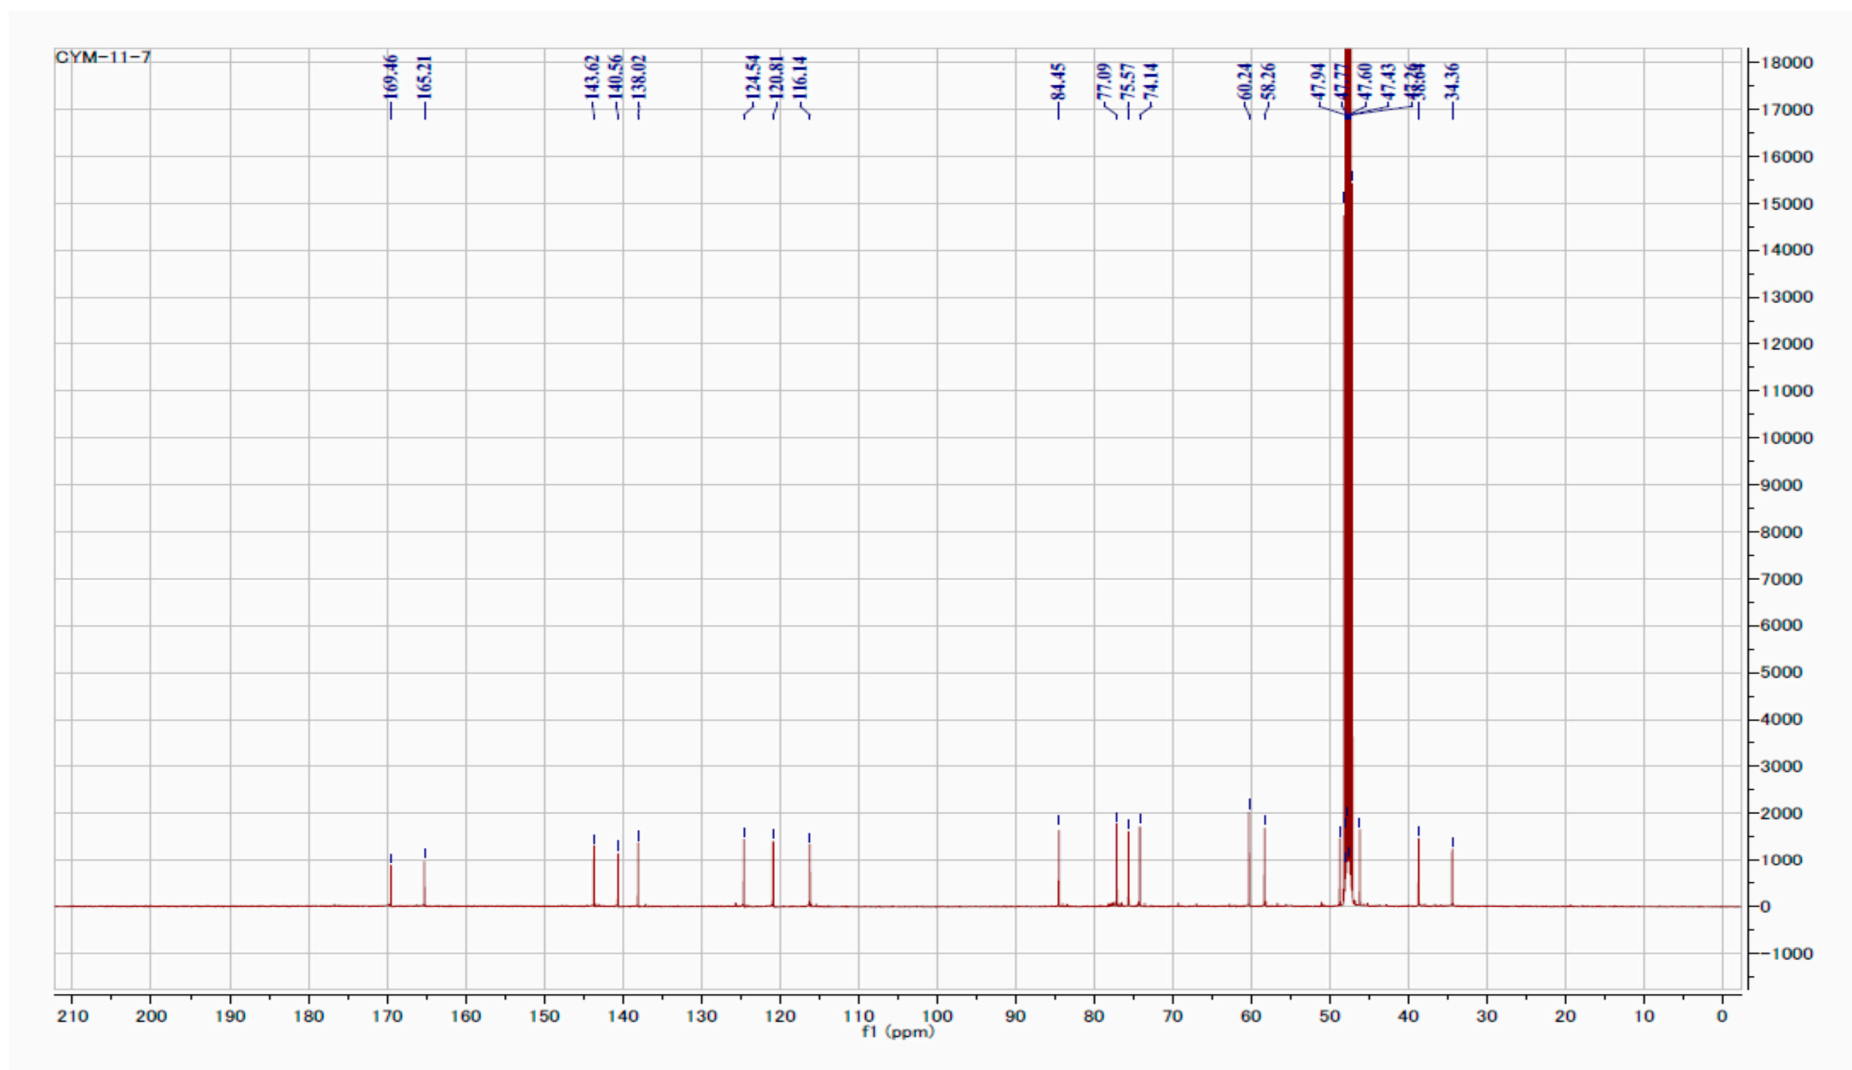

S26:  $^{13}\text{C}$  NMR ( $\text{C}_5\text{D}_5\text{N}$ , 125 MHz) of 7

3-methoxy phenol

CVN-11-13  
CVN-11-13

```
Sample Name:
exp1 PROCES
Data Collected on:
4000-xxxxxx00
Acquire Date: 11/13/93
Solvent: cdcl3
Sample directory: exp
ACQUISITION temp not used
Pulse: PROTON 410.3 gain 56
at 1.500 spin 20
Pulse Sequence: zgpg30 (zgpg30) 0.008
Solvent: cdcl3 4000 pw99 14.800
Data collected on: 11/13/93 10.000
d1 1.500
Operator: vnmr1 16 il n
ct 16 in n
Relaxation delay: 3.000 sec Y
Pulse 45.0 degrees kl hc
Acquire time 3.500 hr 0.20
1638 positions 58 fo not used
OBSERVE kl 359.422011 NOISY
DATA PROCESSOR sp -806.1
LINE broadening 0.2 Hz MP 6419.1
FT date 05536 0 x ml 806.3
Total time 1 min 29 sec TP
decouple w40_rfc05m sp -123.1
cpwv 38 lp 0
chf 25412
vc 375
sc 8
vs 240
th
xl odc ph 7
```

mono methoxylated  
flavonoid

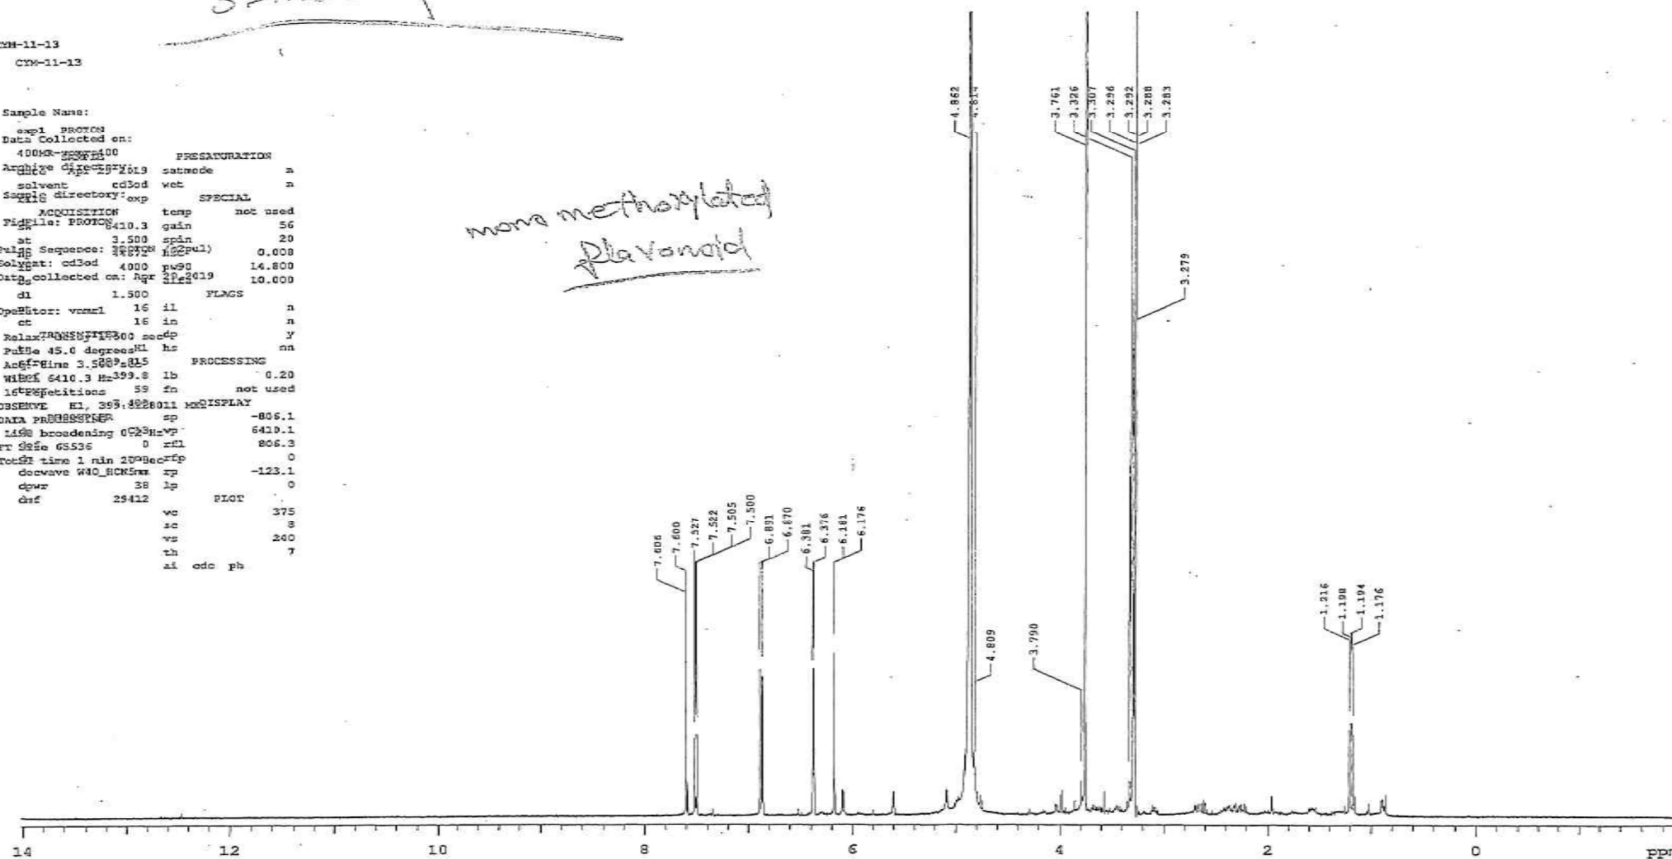

S27: <sup>1</sup>H NMR (CDCl<sub>3</sub>, 500 MHz) of 8

CYM-11-13  
CYM-11-13

Sample Name:  
Data Collection: 400MR-PROTON  
Archive directory: cd3od  
Sample directory: exp  
ACQUISITION temp not used  
File: PROTON410.3 gain 56  
at 3.500 spin 20  
Pulse Sequence: zgpg30 (zgpg30) 0.008  
Solvent: cd3od 4000 pw90 14.800  
Date collected on: Apr 22 2019 10.000  
d1 1.500 FLAGS  
Operator: vmm1 16 il n  
ct 16 an n  
RelaxTime: 1.000 sec y  
Pulse 45.0 degree nl hs  
AcqTime: 3.500 min  
Width: 6.3 Hz  
Resolution: 59 fm not used  
Observer: JL 193, 41011  
Data: 2455.4  
Line broadening: 602.7  
FT Sfe: 65536 0 xfl 806.3  
Total time: 1 min 20 sec  
decwave: W40\_HCN5mm rp -123.1  
dpwr: 38 lp 0  
dmf: 2947 PLOT  
7.500 375  
7.500 8  
7.500 570  
7.500 7

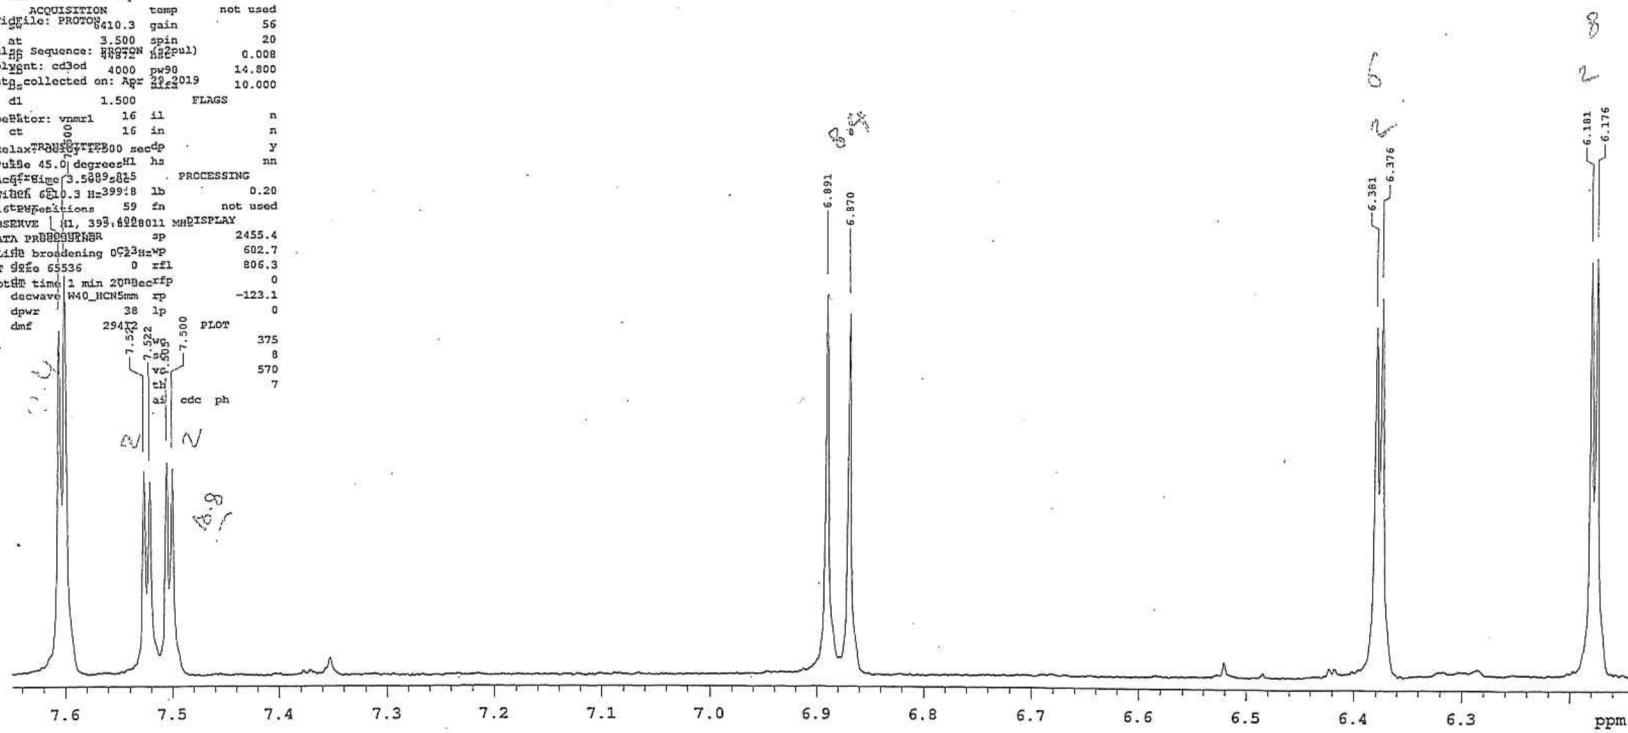

S27:  $^1\text{H}$  NMR ( $\text{C}_5\text{D}_5\text{N}$ , 125 MHz) of **8**

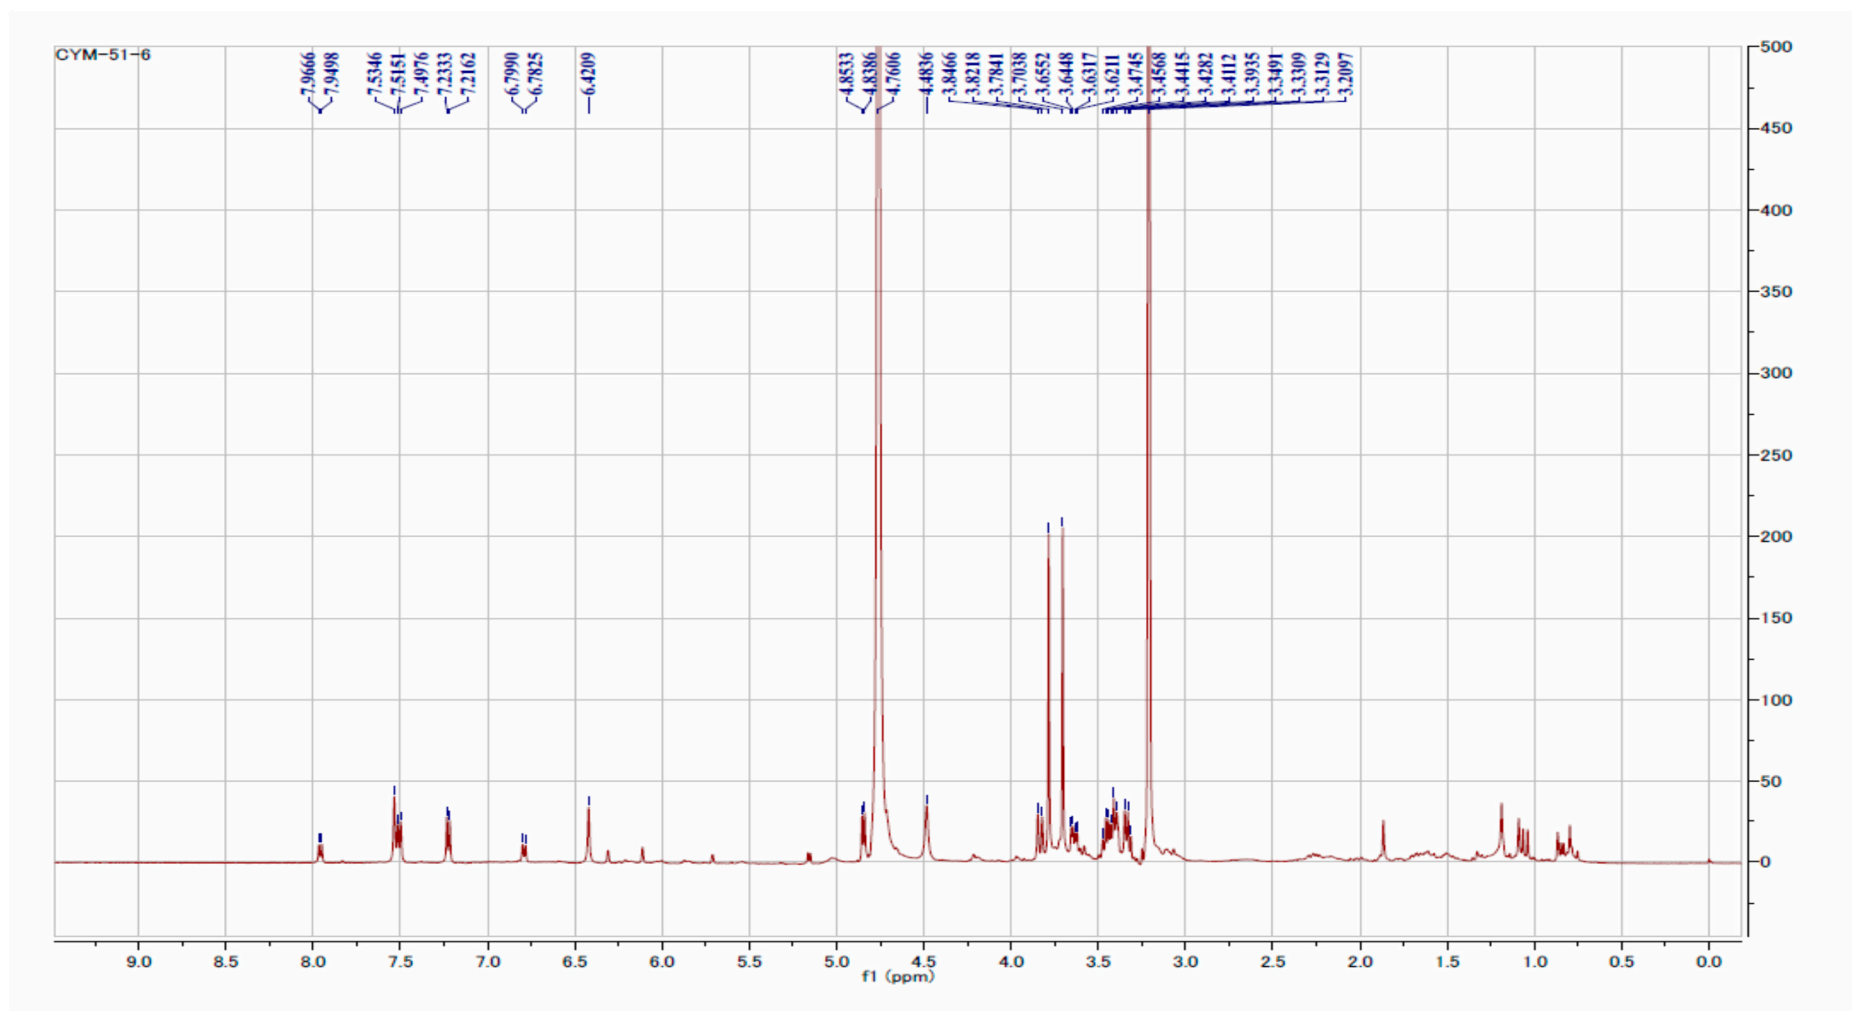

S28:  $^1\text{H}$  NMR ( $\text{CDCl}_3$ , 500 MHz) of **9**
